# Supplementary material
Source: HighWire-hosted journal article supplement (https://gut.bmj.com/content/72/5/821)
Supplement: inline-supplementary-material-1 [file inline-supplementary-material-1.pdf]

## **IL-20 subfamily cytokines impair the esophageal epithelial barrier by diminishing filaggrins in eosinophilic esophagitis**

Tanay Kaymak<sup>1</sup>, Berna Kaya<sup>1</sup>, Philipp Wuggenig<sup>1</sup>, Sandro Nuciforo<sup>2</sup>, Andreas Göldi<sup>3</sup>, Swiss EoE Cohort Study Group, Franz Oswald<sup>4</sup>, Julien Roux<sup>1,5</sup>, Mario Noti<sup>6</sup>, Hassan Melhem<sup>1</sup>, Petr Hruz<sup>3</sup>, Jan Hendrik Niess<sup>1,3,7\*</sup>

<sup>1</sup>Department of Biomedicine, Gastroenterology, University of Basel, 4031 Basel, Switzerland

<sup>2</sup>Department of Biomedicine, Hepatology, University of Basel, 4031 Basel, Switzerland

<sup>3</sup>Clarunis - University Center for Gastrointestinal and Liver Diseases Basel, 4031 Basel, Switzerland

<sup>4</sup>Internal Medicine I, University Hospital Ulm, 89070 Ulm, Germany

<sup>5</sup>Swiss Institute of Bioinformatics, 4031 Basel, Switzerland

<sup>6</sup> Institute of Pathology, University of Bern, 3006 Bern, Switzerland. Current address: Nestlé SA, Nestlé Research, Nestlé Institute of Health Sciences, Department of Gastrointestinal Health Immunology, Vers-Chez-les-Blancs, CH-1000, Lausanne, Switzerland

<sup>7</sup>Department of Clinical Research, University of Basel, Basel, Switzerland

**TABLE OF CONTENT**

|                                                     |           |
|-----------------------------------------------------|-----------|
| <b>SUPPLEMENTAL MATERIAL AND METHODS .....</b>      | <b>3</b>  |
| <b>SUPPLEMENTAL TABLES.....</b>                     | <b>21</b> |
| Supplemental Table 1. Patient characteristics ..... | 21        |
| Supplemental Table 2. qPCR primers .....            | 22        |
| Supplemental Table 3. Genotyping primers.....       | 23        |
| Supplemental Table 4. Key resources .....           | 23        |
| Supplemental Table 5. Cell lines .....              | 27        |
| Supplemental Table 6. Antibodies.....               | 27        |
| <b>SUPPLEMENTAL FIGURES.....</b>                    | <b>31</b> |
| Supplemental Figure 1.....                          | 32        |
| Supplemental Figure 2.....                          | 33        |
| Supplemental Figure 3.....                          | 35        |
| Supplemental Figure 4.....                          | 37        |
| Supplemental Figure 5.....                          | 39        |
| Supplemental Figure 6.....                          | 41        |
| Supplemental Figure 7.....                          | 42        |
| Supplemental Figure 8.....                          | 44        |
| <b>SUPPLEMENTAL REFERENCES.....</b>                 | <b>45</b> |

## SUPPLEMENTAL MATERIAL AND METHODS

### Mouse lines

*C57BL/6 (WT)*, *Il19-TdTomato (Il19<sup>tdT</sup>)*, [1] *Il20R2<sup>-/-</sup>* mice kindly provided by Franz Oswald, Internal Medicine I, University Hospital Ulm, Ulm, Germany, [2] *Stat3<sup>flx/flx</sup>* mice kindly provided by Radek Skoda, Department of Biomedicine, University of Basel, Basel, Switzerland, [3] *Cx3cr1<sup>CreER</sup>* (B6.129P2(Cg)-*Cx3cr1<sup>tm2.1(cre/ERT2)</sup>Litt*/WganJ) and *Krt5-CreERT2* (B6N.129S6(Cg)-*Krt5<sup>tm1.1(cre/ERT2)</sup>Blh*/J) mice were bred and maintained under specific pathogen-free (SPF) conditions in the animal facility of Department of Biomedicine, University of Basel, Switzerland. *Il19<sup>flx/flx</sup>* have been generated as described in detail below. *Stat3<sup>flx/flx</sup>* have been crossed with *Krt5-CreERT2* to obtain *Stat3<sup>ΔKrt5</sup>* mice, and *Il19<sup>flx/flx</sup>* have been bred with *Cx3cr1<sup>CreER</sup>* mice to generate *Il19<sup>ΔCX3CR1</sup>* mice. In *Stat3<sup>ΔKrt5</sup>* mice, the tamoxifen-inducible, Cre-mediated recombination will lead to the excision of *Stat3* in Keratin5<sup>+</sup> squamous epithelial cells, and in *Il19<sup>ΔCX3CR1</sup>* the tamoxifen-inducible, Cre-mediated recombination will excise *Il19* in CX3CR1<sup>+</sup> cells. We have randomly assigned the selected animals between 6-12 weeks of age to the experimental groups. At least three animals per group were used for the respective *in vitro* and *in vivo* experiments. Mouse experiments have been carried out following the Swiss Federal and Cantonal regulations (animal protocol number 2938 (canton Basel Stadt)).

### Generation of *Il19*-flox mice

The *Il19* conditional knockout mice were generated by Biocytogen Pharmaceuticals (Wakefield, USA). In brief, homology regions covering 4.5 kb upstream of *Il19* exon 4 and 4.0 kb downstream of 3'UTR were subcloned from a BAC clone (RP23-190F9; Invitrogen) from a *C57BL/6J* mouse genomic BAC library. FRT-flanked Neo resistance positive selection cassette was inserted downstream of 3'UTR, and two loxP sites were introduced

upstream of exon 4 and downstream of 3xStop, respectively. After linearisation, the targeting vector was transfected into *C57BL/6* embryonic stem (ES) cells by electroporation. Seven positive clones were identified by Southern blotting with 5'probe, 3'probe, and Neo probe (3'). Three positive clones were injected into Balb/c blastocysts and implanted into pseudopregnant females. Chimeric mice were crossed with Flp mice to obtain F1 mice carrying the recombined allele containing the floxed *Il9* and E2 SA IRES-TdTomato-WPRE-pA allele (**supplemental figure 5C**). The *Il9*-flox mice were genotyped by PCR by denaturation at 95°C for 3 min, amplifying 40 cycles at 95°C 30 sec, 62°C 30 sec, 72°C 25 sec, and elongating at 72°C for 10 min. Primers are listed in **supplemental table 3**.

### Esophageal organoids

Esophageal organoids have been generated from biopsies obtained from control and EoE subjects adapted to a protocol reported by Kasagi et al..[4] Briefly, after the preservation of biopsies, taken during upper endoscopy, in keratinocyte serum-free medium (KSFM; Keratinocyte-SFM (Gibco) containing 100 U/ml Penicillin, 100 µg/ml Streptomycin (Gibco), 50 µg/ml bovine pituitary extract (BPE; Gibco), 1 ng/ml epidermal growth factor (EGF; Gibco), and 0.09 mM Calcium chloride; (Sigma-Aldrich) on ice, the KSFM medium was replaced with 10 U/mL Dispase I (Corning) and incubated for 10 min at RT. Afterward, the biopsies were rinsed with PBS and digested in 0.05% Trypsin-EDTA (Sigma-Aldrich) using a ThermoMixer C (Eppendorf) at 37°C and 800rpm for 10 min. The cells were further dissociated with the plunger of a tuberculin syringe, filtered through a 70 µm cell strainer, and then filtered through a 35 µm cell strainer (BD Bioscience) in a round bottom polystyrene tube using 250 ug/ml soybean trypsin inhibitor (Sigma-Aldrich). After transfer in 15 ml falcon tubes, the single-cell suspension was spun down at 300xg, 4°C for 5 min, and counted after resuspending in KSFM using an EVE automated cell counter (NanoEntek).

25000-30000 cells were seeded in a 40µL droplet Cultrex Basement Membrane Extract (BME), Type 2, Pathclear (R&D Systems). BME droplets were polymerised for 25min at 37°C before KSFM-C ( $\text{Ca}^{2+}$  concentration titrated to 0.6 mM using calcium chloride; Sigma-Aldrich) supplemented with 10 µM Y27632 small molecule ROCK inhibitor (Tocris) was added. The medium was changed every other day (without the Y27632 small molecule ROCK inhibitor). Organoids were cultured for 5-11 days.

### **Esophageal air-liquid interface cultures (ALIs)**

Esophageal biopsies from control subjects obtained during upper endoscopy were collected in KSFM medium (Keratinocyte-SFM medium supplemented with 50ug/ml BPE, 100 U/ml Penicillin, 100 µg/ml Streptomycin and 1ng/ml EGF). After the dispersion of biopsies with 10 U/mL Dispase I (Corning) and 0.05% Trypsin/EDTA (Sigma-Aldrich), the primary keratinocytes were expanded in KSFM ( $\text{Ca}^{2+}$  0.09mM) medium in T25 Primaria culture flasks (Corning; #353808) and passaged using TrypLE Express Enzyme (Gibco). The expanded keratinocytes ( $\geq$ P2) were then seeded on inserts of 12-well or 24-well Transwell plates with 0.4 µm polyester membrane inserts (Corning; #3460 or #3470) at a density of 200'000 keratinocytes per 0.6 cm<sup>2</sup> for 12-well plates and 155'000 keratinocytes per 0.5 cm<sup>2</sup> for 24-well plates. ALIs were cultured with KSFM medium ( $\text{Ca}^{2+}$  0.09mM) for 2 days until a confluent monolayer was formed. KSFM medium was replaced with a Calcium-rich KSFM medium ( $\text{Ca}^{2+}$  1.8mM) on day 2 and replaced every other day until day 7. On day 7 the medium was removed from the upper chamber to expose the epithelium to air. Calcium-rich KSFM was supplemented with 10ng/ml KGF/FGF7 (R&D Systems) and 75ug/ml L-Ascorbic acid (Sigma-Aldrich) from day 7. ALIs were cultured for 14 days. Where indicated, ALIs were stimulated with 100 ng /ml IL-19, IL-20, IL-24, and 50 µM ERK1/2 inhibitor PD98059 (Cell Signaling Technology) or 1 µM Cucurbitacin I (Tocris) from day 7 until day 14.

### **Cell lines**

The esophagus squamous cell carcinoma cell line KYSE-180 (ACC 379) was obtained from the Leibniz Institute DSMZ-German Collection of Microorganisms and Cell Cultures. The KYSE-180 cell line was cultured in 90% RPMI-1640 / 10% FBS supplemented with 100 U/ml Penicillin, 100 µg/ml Streptomycin. The cells were cultured at 37°C, 5% CO<sub>2</sub>, medium replaced every 2-3 days, and were passaged with 0.25% Trypsin-EDTA (SAFC Biosciences) upon 60-80% confluency.

### **Cytokine stimulation**

Esophageal organoids, ALIs, and KYSE-180 cells were stimulated with 100ng/ml IL-19 (R&D Systems), IL-20 (R&D Systems), and IL-24 (R&D Systems) for 6-24h (KYSE-180), 24h (organoids) or 8d (ALIs). Where indicated, the STAT3 inhibitor Cucurbitacin I (Tocris) or ERK1/2 inhibitor PD98059 (Cell Signaling Technology) at a final concentration of 1-10 µM or 50 µM was added 2 h or 1 h before cytokine stimulation.

### **Measurement of transepithelial electrical resistance (TEER) and fluorescein isothiocyanate (FITC)-dextran flux**

Transepithelial electrical resistance (TEER) was measured to monitor the epithelial integrity in ALI cultures using an EVOM 3 (World Precision Instruments) on days 0, 2, 4, 7, 9, 11, 12, 13, and 14 of culture. Paracellular flux was measured using FITC-dextran 3-5 kDa (Sigma-Aldrich) at day 14 of culture in 15 to 30 min intervals for a total of 180 min using a fluorescence plate reader (BioTek).

### OVA-induced EoE mouse model

The protocol for an EoE mouse model has been adapted to a protocol reported by Noti et al.[5] In brief, mice were sensitised by treating both ears with 1 nmol MC903 (calcipotriol; Tocris) in 20 µl absolute ethanol followed by 10 µl of 5 mg/mL OVA Grade 5 (Sigma-Aldrich) dissolved in PBS. Treatment with the same volume of ethanol and OVA alone served as vehicle control. Sensitisation treatment is repeated daily for 14 days. On day 14 the drinking water is replaced with autoclaved water containing 1.5 g OVA / L and given for four days. On days 15 and 17, the mice are additionally challenged by gavage with 50 mg OVA in 100 µl water. Mice are sacrificed for organ collection on day 18 (**supplemental figure 4A**). *Stat3<sup>ΔKrt5</sup>* and *Il19<sup>ΔCX3CRI</sup>* mice and their respective *Stat3<sup>fllox/fllox</sup>* and *Il19<sup>fllox/fllox</sup>* littermates were administered 100 µL (75mg/kg body weight) tamoxifen (MedChemExpress) dissolved in corn oil (Sigma-Aldrich) via intraperitoneal injection (i.p.) daily from day 10 of sensitisation until the end of the experiment. Where indicated *WT* mice were treated with PD98059 (10mg/kg; MedChemExpress) diluted in 90% saline and 10% dimethyl sulfoxide (DMSO) v/v i.p. daily from day 14 until the end of the experiment. Experimental groups are defined as following: ctrl: non-sensitised+non-challenged, non-sens: non-sensitised+challenged, non-chal: sensitised+non-challenged, sens+chal: sensitised+challenged.

### Mouse esophagus cell isolation

After preparing the esophagus by separating the esophagus from the trachea, cutting the distal and proximal ends of the esophagus, and pulling the esophagus out from the mediastinum, the esophagus is washed in PBS. Remnant connective tissue is removed, the esophagus is opened longitudinally, washed again with PBS, and minced in small pieces. The tissue is then digested in Roswell Park Memorial Institute (RPMI) 1640 (Sigma-Aldrich) containing 0.5mg/ml collagenase IV (Sigma-Aldrich) and 10U/ml DNase I (Roche) for 30mins in a

shaking (200rpm) water bath at 37°. The samples are vortexed every 10 min. Digested tissue was filtered through a 70 µM cell strainer (Sarstedt). The single-cell suspension was centrifuged 5 mins at 600xg (4°C) and transferred to conical 96-well plates (Sarstedt) for further analysis by flow cytometry.

### **Flow cytometry, cell Staining, and antibodies**

Esophageal cells were stained for 30 mins at 4°C with fixable viability dye eFluor455UV (Invitrogen) and anti-CD16/CD32 (Fc receptor) clone 93 (BioLegend) for live/dead cell exclusion and to prevent non-specific binding. Cells were resuspended in PBS containing 2% Fetal Bovine Serum (FBS), 0.1% sodium azide, and 10 mM EDTA (FACS buffer) and stained for surface antigen markers for 20min at 4 °C. Stained cells were resuspended in FACS buffer and acquired on a Fortessa flow cytometer (BD Biosciences). Data were analysed using FlowJo software version 10.4.0 (TreeStar). Doublet discrimination on forward scatter (FSC-H) versus FSC-A plot was done in all analyses. The following antibodies have been used: Superbright 645-conjugated anti-mouse CD45 clone 30-F11 (Invitrogen), APC-conjugated anti-mouse CD49b (Integrin  $\alpha 2$ ) clone DX5 (Invitrogen), APC/Fire 750-conjugated anti-mouse CD117 (c-kit) clone 2B8 (BioLegend), BV711-conjugated anti-mouse Siglec-F clone E50-2440 (BD Biosciences), FITC-conjugated anti-mouse IgE clone 23G3 (Invitrogen), PE/Cy7-conjugated anti-mouse CD64 (Fc $\gamma$ R1) clone X54-5/7.1 (BioLegend) and FITC-conjugated anti-mouse CD11b clone M1/70 (BioLegend). Biotin-conjugated anti-mouse CD11c clone N418 (BioLegend), anti-mouse CD3e clone 145-2C11 (BioLegend), Biotin-conjugated anti-mouse CD19 clone 6D5 (BioLegend), Biotin-conjugated anti-mouse NK1.1 clone PK136 (BioLegend) and Biotin-conjugated anti-mouse TER-119/Erythroid cells clone TER-119 (BioLegend) followed by either eFluor450/Pacific Blue-conjugated Streptavidin (Invitrogen) or PE-Cy5-conjugated Streptavidin (BioLegend) was added for



lineage exclusion. Eosinophils were identified as live, lin<sup>-</sup>, CD45<sup>+</sup>, Siglec-F<sup>+</sup> cells (supplemental figure 7). IL-19 producing macrophages were identified as live, lin<sup>-</sup>, CD45<sup>+</sup>, CD11b<sup>+</sup>, CD64<sup>+</sup>, tdTomato<sup>+</sup> cells.

### RNA extraction and quantitative PCR

RNA was extracted from human esophageal biopsies, mouse esophagus, bone marrow-derived macrophages, and the KYSE-180 cell line using TRI Reagent (Sigma-Aldrich) or Direct-zol RNA MiniPrep (Zymo Research) according to the manufacturer's instructions. After removing DNA contaminants with DNase Max Kit (Qiagen), RNA samples were reverse transcribed using High Capacity cDNA Reverse Transcription (Applied Biosystems) according to the manufacturer's instructions. The SYBR Green PCR (Qiagen) or TakyonLow Rox SYBR MasterMix blue (Eurogentec) kits were used for the quantitative PCR, and PCR was run on an ABI ViiA 7 cycler. After normalisation of Ct to *GAPDH* or *ACTB/Actb*, the relative expression was calculated with the  $2^{(-\Delta Ct)}$  formula. Used primers are listed in supplemental table 2.

### Esophageal organoid embedding in histogel

After BME digestion with 1.5 U/mL Dispase II (Sigma-Aldrich), organoids are washed with PBS and fixated with 1 ml 4 % paraformaldehyde (PFA) for 30-60mins at RT. After fixation, organoids are centrifuged with 300xg for 5mins at 4°C and washed with PBS supplemented with 1% BSA. After washing, organoids are centrifuged (300xg for 5mins at 4°C) again and resuspended in 70 µL Histogel (EpreDia). After polymerisation of the Histogel (60 min), organoids are stored in 50% EtOH until Paraffin embedding using the TPC 15 Tissue Processor (Medite Medizintechnik) and TES Valida embedding station (Medite Medizintechnik).

### **Hematoxylin-Eosin (H&E) staining**

Esophageal tissues were fixed in 4 % paraformaldehyde and embedded in paraffin blocks.

After sectioning, four-micrometer sections were stained with H&E and analysed with a Nikon Eclipse Ti2 microscope using the Nikon DS-Ri2 (RGB CMOS) camera. Eosinophil numbers were quantified using Fiji (ImageJ, Version 2.0.0-rc-68/1.52h).[6]

### **Immunohistochemistry**

Tissue and organoid sections were deparaffinised in xylene and rehydrated in graded EtOH. Antigen retrieval was performed by incubation in citrate buffer solution (pH=6) for 20mins at 95°C in a microwave tissue processor (KOS). Endogenous peroxidases were blocked with 3% hydrogen peroxide (Roth) for 10 min at room temperature followed by 1 h blocking with PBS containing 0.1% Tween20 and 5-10% goat serum (all Sigma-Aldrich) before overnight incubation at 4°C with a rabbit anti-human IL-20R $\alpha$  monoclonal antibody (Sino Biological Inc.), a rabbit anti-human IL-20R $\beta$  polyclonal antibody (Abcam), a rabbit anti-Ki67 monoclonal antibody SP6 (Abcam; kindly provided by Rishika Agarwal, Skin biology group, Department of Biomedicine, University of Basel, Basel, Switzerland) or a rabbit anti-human FLG2 polyclonal (Novus; 1:200). On the next day, the sections were washed with PBS and incubated with a goat anti-rabbit IgG horseradish peroxidase-conjugated secondary antibody (Jackson ImmunoResearch; 1:500) for 2h at room temperature. 3,3' Diaminobenzidine substrate (BD Pharmingen) was used to reveal staining. Sections were counterstained with hematoxylin, dehydrated with graded EtOH and xylene, and mounted with a xylene-based mounting medium.

Immunohistochemistry for FLG in human paraffin sections was performed by Ventana Discovery Ultra (Roche Diagnostics Suisse SA) automated stainer. In brief, tissue sections were deparaffinised and rehydrated. Antigen retrieval was performed by heat in Cell Conditioning buffer 1 (CC1, Ventana; #950-124) at 95°C for 40 minutes. Primary rabbit anti-

human FLG polyclonal (Abcam, 1:100) antibody was manually applied and incubated for 1 hour at 37°C. After washing, sections were incubated with an HRP-Polymer secondary antibody for 1 hour at 37°C. Alternatively, an amplification kit (Ventana; #760-080) was used to further amplify the signal before the detection by an HRP-Polymer antibody. Detection was performed using the Ventana DISCOVERY ChromoMap DAB (Ventana; #760-159) detection kit. Tissues were then counterstained with hematoxylin II, followed by the bluing reagent (Ventana; respectively #790-2208 and #760-2037). Sections were then dehydrated, cleared and mounted with permanent mounting and coverslips. Imaging was performed using a Nikon Eclipse Ti2 microscope using the Nikon DS-Ri2 (RGB CMOS) camera and analysed with Fiji (ImageJ, Version 2.0.0-rc-68/1.52h)[6] or QuPath[7] software.

### **Immunofluorescence staining**

Mouse tissues were fixed with 4% PFA and embedded in paraffin. All tissues were sectioned at 4 µM. Blocking and permeabilisation were done using PBS containing 0.1% Tween20 and 5-10% Goat serum (all Sigma-Aldrich). Tissue sections were stained with Chicken anti-Keratin 5 polyclonal clone Poly9059 (BioLegend) and Alexa Fluor 488 AffiniPure goat anti-chicken IgY (IgG) (H+L) secondary antibody (Jackson ImmunoResearch) together with rabbit anti-Stat3 monoclonal clone D3Z2G (Cell Signaling Technology) and Alexa Fluor 647 goat anti-rabbit IgG secondary antibody (Invitrogen). For all samples, nuclear staining was performed using Nuc Blue™ Live Cell Stain (Invitrogen), and imaging was done using a Nikon A1R confocal microscope. Brightness and contrast settings were maintained between images using NIS software.

### **Esophageal organoid RNA isolation**

BME is digested by incubation with 1.5 U/mL Dispase II (Sigma-Aldrich) for 20-25 min at 37°C. After digestion Dispase II (Sigma-Aldrich) is removed, the organoids are washed with PBS supplemented with 1% BSA and centrifuged at 300xg for 5mins at 4°C. PBS is removed, and 1 ml RNA lysis buffer (Qiagen) is added. The organoids are vortexed and resuspended with a pipette until all organoids are lysed and transferred to 1.5 ml Eppendorf Tube (Sarstedt) and frozen at -80°C until usage. RNA was isolated using RNeasy Plus Mini Kit (Qiagen).

### **RNA sequencing**

Organoids derived from esophagus biopsies of five control donors were subjected to a cytokine treatment (IL19, IL20 and IL24) for 24h after 11 days of culture. Unstimulated organoids from the same donors were kept in culture in parallel. Total RNA was extracted using RNeasy Plus Mini Kit (Qiagen) and quality-checked on the Bioanalyzer instrument (Agilent Technologies, Santa Clara, CA, USA) using the RNA 6000 Nano Chip (Agilent Technologies, Santa Clara, CA, USA) and then quantified by Spectrophotometry using the NanoDrop ND-1000 Instrument (NanoDrop Technologies, Wilmington, DE, USA). RNA-seq library preparation was performed at the Genomics Facility Basel of the ETH Zurich, Basel: 220ng total RNA of each sample was aliquoted for library preparation with the TruSeq Stranded mRNA LT Sample Prep Kit (Illumina, San Diego, CA, USA). After quality-check of the libraries on the Fragment Analyzer (Advanced Analytical, Ames, IA, USA) with the Standard Sensitivity NGS Fragment Analysis Kit (Advanced Analytical) (average concentration was  $126 \pm 13$  nmol/L and average library size was  $345 \pm 7$  base pairs), samples were pooled to equal molarity. Each pool was quantified by PicoGreen Fluorometric measurement to be adjusted to 1.5 pM and used for clustering on the NextSeq 500 instrument

(Illumina). Paired-end 38nt reads were produced using the NextSeq 500 High Output Kit 75-cycles (Illumina). Raw fastq files were generated using the Illumina RTA version 2.4.11 and bcl2fastq-2.18.0.12.

Data analysis was performed by the Bioinformatics Core Facility, Department of Biomedicine, University of Basel. Read quality was assessed with the FastQC tool (version 0.11.5). Reads were mapped to the human genome hg38 “analysis set” with STAR (version 2.7.0c)[8] with default parameters, except filtering out multimapping reads with more than 10 alignment locations (*outFilterMultimapNmax=10*) and filtering reads without evidence in the spliced junction table (*outFilterType=“BySJout”*). All subsequent analyses were performed using the R software (version 4.0.3) and Bioconductor 3.12 packages. The *featureCounts* function from the Bioconductor Rsubread package (version 2.0.1)[9] was used to count the number of read (5' ends) overlapping with the exons of each gene (Ensembl release 96) assuming an exon union model.[10, 11]

The Bioconductor package edgeR (version 3.30.3)[12] was used for differential gene expression analysis. Between samples normalisation was performed using the TMM method. [13] Genes with CPM values above 1 in at least 4 samples were retained for the differential expression analysis. To test for differences between the stimulated and unstimulated organoids a model accounting for the condition and donor effects was fitted to the read counts using a quasi-likelihood testing framework (edgeR functions *glmQLFit* and *glmQLFTest*).[14] P-values were adjusted by controlling the false discovery rate (FDR; Benjamini-Hochberg method) and genes with an FDR lower than 1% were considered significant. Gene set enrichment analysis was performed with the function *camera*[15] from the edgeR package (using the default parameter value of 0.01 for the correlations of genes within gene sets) using gene sets from the c5 collection (Gene Ontology categories) of the

MSigDB Molecular Signature Database (version 7.0).[16] We filtered out sets containing less than 10 genes, and gene sets with an FDR lower than 5% were considered significant.

The processed read count table of the RNA-seq dataset is available on GEO under accession GSE181261 (<https://www.ncbi.nlm.nih.gov/geo/query/acc.cgi?acc=GSE181261>).[17]

### **Reanalysis of public RNA-seq datasets**

Raw data for the accessions GSE58640,[18] GSE65335,[19] and GSE103356[20] were retrieved from the GEO database and processed similarly to described above, to extract genes and gene sets differentially regulated between respectively (i) esophageal tissues from patients with eosinophilic esophagitis vs. control donors, (ii) IL-13 stimulated vs. unstimulated differentiated EPC2 immortalised esophageal epithelial cells and (iii) SPINK7-silenced vs. control differentiated EPC2 cells.

For unknown reasons, in GSE58640, all samples but one included paired-end reads. The sample GSM1415921 sequenced with single-end reads was excluded, leaving us with a total of 6 control donors and 9 EoE patients. In both groups donors of different sex were present, a factor which was associated to the second component of a principal component analysis. We thus included sex as a covariate in the model for differential expression analysis.

### **Global Proteomics Analysis using Tandem Mass Tags (TMT)**

After the digestion of the BME with 1.5 U/mL Dispase II (Sigma-Aldrich), 100  $\mu$ L protein lysis buffer (5% SDS, 10 mM TCEP, 100 mM Triethyloammonium bicarbonate (TEAB), pH = 8.5) was added, and organoids were lysed by tissue lyser (Qiagen) in the 4°C cold room at 25/s. Then three freeze/thaw-cycles with dry ice were performed, and the samples were centrifuged with maximum speed at 4°C for 20min to transfer the protein lysate without debris into a new 1.5 ml Eppendorf tube. Protein concentration was determined by BCA assay (Thermo Fisher Scientific) using a small sample aliquot. Sample aliquots containing 50

µg of total proteins were reduced for 10 min at 95 °C and alkylated at 15 mM iodoacetamide for 30 min at 25 °C in the dark. Proteins were purified and digested using S-traps micro columns (Protifi, NY, US) according to the manufacturer's instructions. Samples were dried under vacuum and stored at -80 °C until further use.

Sample aliquots comprising 5 µg of peptides were labeled with isobaric tandem mass tags (TMT 10-plex, Thermo Fisher Scientific) as described previously[21] using a Freedom Evo 100 liquid handling platform (Tecan Group Ltd., Männedorf, Switzerland). Shortly, peptides were resuspended in a 10 µl labeling buffer (2 M urea, 0.2 M HEPES, pH 8.3), and 2.5 µl of each TMT reagent was added to the individual peptide samples followed by a 1 h incubation at 25°C, shaking at 500 rpm. The labeling reaction was quenched by adding 0.75 µl aqueous 1.5 M hydroxylamine solution and incubation for 10 min at 25°C. After pooling, the pH of the obtained sample was increased to 11.9 by adding 1 M phosphate buffer (pH 12) and incubated for 20 min at 25°C to remove TMT labels linked to peptide hydroxyl groups. Subsequently, the reaction was stopped by adding 2 M hydrochloric acid until a pH < 2 was reached. Finally, the peptide sample was further acidified using 5 % TFA, desalted using Sep-Pak Vac 1cc (50 mg) C18 cartridges (Waters) according to the manufacturer's instructions, and dried under vacuum.

TMT-labeled peptides were fractionated by high-pH reversed-phase separation using an XBridge Peptide BEH C18 column (3,5 µm, 130 Å, 1 mm x 150 mm, Waters) on an Agilent 1260 Infinity HPLC system. Peptides were loaded on a column in buffer A (20 mM ammonium formate in water, pH 10) and eluted using a two-step linear gradient from 2% to 10% in 5 minutes and then to 50% buffer B (20 mM ammonium formate in 90% acetonitrile, pH 10) over 55 minutes at a flow rate of 42 µl/min. The elution of peptides was monitored with a UV detector (215 nm, 254 nm). Thirty-six fractions were collected and pooled into 12

fractions using a post-concatenation strategy as previously described[22] and dried under vacuum.

Dried peptides were resuspended in 0.1% aqueous formic acid and subjected to LC-MS/MS analysis using an Exploris 480 Mass Spectrometer fitted with an Ultimate 3000 nano-LC (both Thermo Fisher Scientific) and a custom-made column heater set to 60°C. Peptides were resolved using a RP-HPLC column (75µm × 30cm) packed in-house with C18 resin (ReproSil-Pur C18–AQ, 1.9 µm resin; Dr. Maisch GmbH) at a flow rate of 0.3 µLmin<sup>-1</sup>. The following gradient was used for peptide separation: from 2% B to 10% B over 5 min to 30% B over 70 min to 50 % B over 15 min to 95% B over 2 min followed by 18 min at 95% B. Buffer A was 0.1% formic acid in water, and buffer B was 80% acetonitrile, 0.1% formic acid in water.

The mass spectrometer was operated in DDA mode with a FAIMS device attached. FAIMS was run in standard resolution mode with 2 alternating CV voltages of -45 and -60V. Total cycle time of approximately 3 s (1.5s per CV voltage). Each MS1 scan was followed by high-collision-dissociation (HCD) of the most abundant precursor ions with dynamic exclusion set to 30 seconds. For MS1, AGC target was set to 300% with a fill time of 25 ms using a resolution of 120,000 FWHM (at 200 m/z). MS2 scans were acquired at a target setting of 200%, a maximum accumulation time of 100 ms, and a resolution of 30,000 FWHM (at 200 m/z) with the enabled TurboTMT option. Singly charged ions and ions with unassigned charge state were excluded from triggering MS2 events. The normalised collision energy was set to 38%, the mass isolation window was set to 0.7 m/z, and one microscan was acquired for each spectrum. The precursor fit threshold was set to 70 % at a fit mass window size of 0.7 m/z.

The acquired raw files were searched against a protein database containing sequences of the



predicted SwissProt entries of *homo sapiens* (www.ebi.ac.uk, release date 2020/04/17) and commonly observed contaminants (in total 20,742 sequences) using the SpectroMine software (Biognosys, version 1.0.20235.13.16424). Standard Pulsar search settings for TMT (“TMT\_Quantification”) were used. Missing intensities were replaced by the global minimum value, and in a given sample the intensities of all peptides belonging to the same protein were summed up.

The differences in protein levels between the stimulated and unstimulated organoids were then tested using the package limma (version 3.44.3)[23] by fitting a linear model accounting for the condition and donor effects to the TMM-normalised logCPM (counts per million) values with the *eBayes* function options *trend=TRUE* and *robust=TRUE*. Given the low number of differentially expressed proteins, we used an FDR cutoff of 20% for significance. The gene set enrichment analysis was performed similarly to the RNA-seq dataset. The mass spectrometry proteomics data have been deposited to the ProteomeXchange Consortium via the PRIDE[24] partner repository with the dataset identifier PXD031509 and 10.6019/PXD031509.[25]

### **Bone marrow cell isolation and mouse bone marrow-derived macrophages**

After the preparation of femurs and tibias and removal of connective tissues and muscles, the bones were cut at the epiphysis, and the bone marrow was flushed out using RPMI 1640 medium (Sigma-Aldrich). After the passage of collected cells through a 70 µm cell strainer, the bone marrow cells were further differentiated into macrophages. In brief, macrophages were generated by culturing in in RPMI 1640 medium containing 10% FCS and supplemented with 0.05 mM 2-ME, 100 U/ml penicillin, 100 µg/ml streptomycin, and 20 ng/ml M-CSF (BioLegend). After 7 days, macrophages were either stimulated with 100 ng/ml Lipopolysaccharide (LPS) from *Escherichia coli* O111:B4 (Sigma-Aldrich) and 10

ng/ml recombinant mouse IFN- $\gamma$  (rmIFN- $\gamma$ ; BioLegend) or with 10 ng/ml recombinant mouse IL-4 (rmIL-4; BioLegend) and 10 ng/ml recombinant mouse IL-13 (rmIL-13; BioLegend) for 6 hours before cell analysis.

### scRNA sequencing

Esophageal samples from *WT* and *Il20R2*<sup>-/-</sup> mice with induced experimental EoE were digested as indicated above and TotalSeq-B antibodies (BioLegend) were used to barcode the individual single-cell suspensions. Hash tagging antibodies TotalSeq-B0301 to B0305 (BioLegend) were used for samples from 5 *WT* animals and TotalSeq-B0306 to B0310 for samples from 5 *Il20R2*<sup>-/-</sup> animals. The pooled cell suspension was sorted for viable CD45.2<sup>+</sup> (BioLegend) cells, and volumes aiming at a targeted recovery of 10,000 cells were loaded on 2 wells of a 10x Genomics Chromium Single Cell Controller to generate 3'end libraries using v3 chemistry. Single-cell libraries were sequenced on an SP flow-cell of an Illumina NovaSeq 6000 sequencer at the Genomics Facility Basel of the ETH Zurich (with 90nt-long R2 reads).

Library and cell barcode demultiplexing, read alignment to the mouse transcriptome (Ensembl release 98)[26] and generation of the table of UMI counts were performed using Cellranger (version 6.0.1). Further processing of the UMI counts table was performed by using R 4.0.5 and Bioconductor 3.12 packages, notably DropletUtils (version 1.10.3),[27, 28] scran (version 1.18.7),[29] and scater (version 1.18.6),[30] following mostly the steps illustrated in the Bioconductor OSCA book (<https://bioconductor.org/books/release/OSCA/>).[10, 29].

Cells were demultiplexed into their samples of origin using the function *hashedDrops* from the DropletUtils package (with default parameters except *min.prop*=0.01, and providing as input the relative abundances of HTOs in the ambient solution). Based on the observed

distributions, cells with 0% or more than 10% of UMI counts attributed to the mitochondrial genes,[31] with less than 1,000 UMI counts, or with less than 500 detected genes were excluded. Doublets identified with the *hashedDrops* function or with the *scDblFinder* package (version 1.4.0) were excluded. A total of 2,633 KO cells (ranging from 500 to 897 cells per sample) and 3,421 WT cells (ranging from 271 to 877 cells per sample) were retained for the next steps of the analysis.

UMI counts were normalised with size factors estimated from pools of cells created with the *scran* package *quickCluster* function.[29, 32] To distinguish between genuine biological variability and technical noise we modeled the variance of the log-expression across genes using a Poisson-based mean-variance trend. The *scran* package *denoisePCA* function was used to denoise log-expression data by removing principal components corresponding to technical noise (20 PCs retained). The scRNA-seq dataset is available on GEO under accession GSE190482

(<https://www.ncbi.nlm.nih.gov/geo/query/acc.cgi?acc=GSE190482>).[33]

### Enzyme-linked immunosorbent assay (ELISA)

The human IL-19 Quantikine ELISA Kit (R&D Systems), the human IL-20 Quantikine ELISA Kit (R&D Systems), and the human IL-24 DuoSet ELISA (R&D Systems) were used to determine the IL-19, IL-20, and IL-24 concentrations in sera from control and EoE subjects.

Mouse IgE was measured with the ELISA MAX™ Deluxe Set Mouse IgE kit (BioLegend), mouse OVA-specific IgE was detected with the LEGEND MAX™ Mouse OVA-specific IgE ELISA kit (BioLegend) in the serum of *WT*, *Il19<sup>tdT</sup>* and *Il20R2<sup>-/-</sup>* mice. Absorbance was measured at 450 nm and 570 nm on a microplate-ELISA reader (BioTek) and the absorbance at 570 nm was subtracted from absorbance at 450 nm.

### Western blotting

Following stimulation with IL-19, IL-20, and IL-24, an ice-cold RIPA buffer containing sodium orthovanadate, PMSF, and protease inhibitor cocktail (Santa Cruz) was used to lyse the cells. After quantifying the protein concentrations with the Bicinchoninic Acid (BCA) method, 10-20 µg of each protein sample was transferred onto a nitrocellulose membrane by electrophoretic separation. After blocking the membranes with 5% dry milk in Tris Buffered Saline + 0.1% Tween20 (TBS-T) buffer for 1 h, the membrane was incubated with the following primary antibodies overnight at 4°C: phospho- NF-κB (p65), NF-κB, phospho- ERK1/2, ERK1/2, phospho- STAT3, STAT3 (all from Cell Signaling Technology) and β-actin (BD Biosciences) at 1:1000 or 1:2000 dilution. After washing in TBS-T for 5 min (3x), the membrane was incubated with horseradish peroxidase-conjugated secondary antibodies anti-rabbit IgG (H+L) and anti-mouse IgG (H+L) (both Jackson ImmunoResearch) at 1:30000 dilution for 1h at room temperature before SuperSignal™ West Femto Maximum Sensitivity Substrate or SuperSignal™ West Pico PLUS Chemiluminescent Substrate (both Thermo Scientific) were used to develop the blots.

## SUPPLEMENTAL TABLES

Supplemental Table 1. Patient characteristics

|                                                                    | Controls (n=30)      | Active EoE (n=22)      | EoE steroids/<br>remission (n=12) |
|--------------------------------------------------------------------|----------------------|------------------------|-----------------------------------|
| <b>Age, mean <math>\pm</math> SD</b>                               | 37.74 $\pm$ 11.09    | 38.77 $\pm$ 8.55       | 37.33 $\pm$ 11.52                 |
| <b>Male sex n (%)</b>                                              | 21 (67.74)           | 16 (72.73)             | 9 (75)                            |
| <b>Body weight, kg, mean <math>\pm</math> SD (n)</b>               | 76.7 $\pm$ 17.8 (31) | 80.97 $\pm$ 18.11 (18) | 68.57 $\pm$ 9.45 (12)             |
| <b>Time since first EoE symptoms, y. mean <math>\pm</math> SD</b>  | -                    | 8.09 $\pm$ 4.92        | 7.67 $\pm$ 8.02                   |
| <b>Time since first EoE diagnosis, y. mean <math>\pm</math> SD</b> | -                    | 3.14 $\pm$ 3.82        | 3.25 $\pm$ 2.64                   |
| <b>History of esophageal dilatations, n (%)</b>                    | 0 (0)                | 0 (0)                  | 2 (16.67)                         |
| <b>History of atopic diseases, n (%)</b>                           | 7 (22.58)            | 16 (72.73)             | 9 (75)                            |
| <b>Having experienced, n (%)</b>                                   |                      |                        |                                   |
| – Nausea/Vomiting                                                  | 11 (36.67)           | 0 (0)                  | 1 (8.33)                          |
| – Heartburn                                                        | 11 (36.67)           | 3 (13.64)              | 4 (33.33)                         |
| – Epigastric pain                                                  | 9 (30)               | 1 (4.55)               | 1 (8.33)                          |
| – Regurgitation                                                    | 13 (43.33)           | 3 (13.64)              | 3 (25)                            |
| – Bloating                                                         | 2 (6.67)             | 0 (0)                  | 0 (0)                             |
| – Dysphagia                                                        | 4 (13.33)            | 22 (100)               | 12 (100)                          |
| – Odynophagia                                                      | 0 (0)                | 3 (13.64)              | 3 (25)                            |
| – Food impaction                                                   | 0 (0)                | 21 (95.45)             | 9 (75)                            |
| <b>PPI treatment, n (%)</b>                                        | 12 (38.71)           | 7 (31.82)              | 4 (33.33)                         |
| <b>Steroids treatment, n (%)</b>                                   | 0 (0)                | 0 (0)                  | 9 (75)                            |
| <b>Peak eos/hpf, mean <math>\pm</math> SD</b>                      | -                    | 83.05 $\pm$ 34.96      | 35.17 $\pm$ 59.06                 |
| – $\geq 15$ eos/hpf n (%)                                          | -                    | 22 (100)               | 5 (41.67)                         |
| <b>Endoscopist assessment, n (%)</b>                               |                      |                        |                                   |
| <b>No signs of EoE</b>                                             | 28 (90.32)           | 1 (4.55)               | 1 (8.33)                          |
| <b>Moderate to severe signs of EoE</b>                             | 3 (9.68)             | 21 (95.45)             | 11 (91.67)                        |
| – edema                                                            | 1 (4.76)             | 10 (45.45)             | 5 (41.67)                         |
| – exsudates                                                        | 0 (0)                | 14 (63.64)             | 6 (50)                            |
| – furrows                                                          | 3 (9.68)             | 19 (86.36)             | 7 (58.34)                         |
| – rings                                                            | 0 (0)                | 14 (63.64)             | 6 (50)                            |
| – stricture                                                        | 0 (0)                | 3 (13.64)              | 2 (16.67)                         |

Supplemental Table 2. qPCR primers

| Target gene    | ENSEMBL gene code  | Forward sequence                 | Reverse sequence                     |
|----------------|--------------------|----------------------------------|--------------------------------------|
| Human IL20RA   | ENSG00000016402    | AGA GGT GGC ACT<br>GAC TAC AGA   | ACT GGG ACC ACG<br>TTC TGT TTG       |
| Human IL20RB   | ENSG000000174564   | AAC TCA ACC ATC<br>CTT ACC CGA C | TTC ACA CAG TAT<br>GCA GCC CC        |
| Human IL22RA 1 | ENSG000000142677   | CTC TGC AGC ACA<br>CTA CCC TCA   | CGT GGG GGT AGG<br>ATG AAC AAT C     |
| Human IL19     | ENSG000000142224   | <i>Qiagen QT00022015</i>         |                                      |
| Human IL20     | ENSG000000162891   | <i>Qiagen QT00044905</i>         |                                      |
| Human IL24     | ENSG000000162892   | <i>Qiagen QT00059059</i>         |                                      |
| Human FLG      | ENSG000000143631   | TCG GCA AAT CCT<br>GAA GAA TCC A | TGC TTT CTG TGC<br>TTG TGT CCT       |
| Human FLG2     | ENSG000000143520   | ACC CAG ATG ATC<br>CAG ACA CAG   | TTG CTG AGG ACC<br>TTG TTG CAG       |
| Human SPINK7   | ENSG000000145879   | TCC CAG GCT CTG<br>ACT GAG TTT   | TGG GTT TGT AGG<br>GGTAGC ACA        |
| Human CCL5     | ENSG000000271503   | CTG CTG CTT TGC<br>CTA CAT TGC C | CAC ACA CTT GGC<br>GGT TCT TTC G     |
| Human CCL11    | ENSG000000172156   | AGA GGC TGA GAC<br>CAA CCC AGA   | ACT TCT TCT TGG<br>GGT CGG CA        |
| Human CCL24    | ENSG000000106178   | GGA GTG GGT CCA<br>GAG GTA CA    | TTA GCA GGT GGT<br>TTG GTT GC        |
| Human CCL26    | ENSG00000006606    | TGG AAT TGA GGC<br>TGA GCC AAA G | CTC CCA CGT GTG<br>GCA GTT           |
| Human ACTB     | ENSG000000075624   | AGC CTC GCC TTT<br>GCC GA        | CTG GTG CCT GGG<br>GCG               |
| Mouse Il20ra   | ENSMUSG00000020007 | AAG TCG AGA AGA<br>ACG TGG TC    | GGG TGT TTT TCC<br>TTG CCA AC        |
| Mouse Il20rb   | ENSMUSG00000044244 | AAT GCT CAC CGA<br>CCA AAA GT    | AGG ACA GTT GCA<br>TTT CGG TT        |
| Mouse Il22ra1  | ENSMUSG00000037157 | GTT CTG CAA CCT<br>GAC TAT GGA G | GTA CAG GTG GCT<br>TGG TGA TG        |
| Mouse Il19     | ENSMUSG00000016524 | CTG GGC ATG ACG<br>TTG ATT CT    | TCT CCA GGC TTA<br>ATG CTC CT        |
| Mouse Il20     | ENSMUSG00000026416 | Qiagen; Cat No.<br>QT00126735    |                                      |
| Mouse Il24     | ENSMUSG00000026420 | Qiagen; Cat No.<br>QT01054634    |                                      |
| Mouse Il5      | ENSMUSG00000036117 | GAT GAG GCT TCC<br>TGT CCC TAC T | TGA CAG GTT TTG<br>GAA TAG CAT TTC C |
| Mouse Il13     | ENSMUSG00000020383 | AAC GGC AGC ATG<br>GTA TGG AGT G | TGG GTC CTG TAG<br>ATG GCA TTG C     |

|                 |                    |                                |                                |
|-----------------|--------------------|--------------------------------|--------------------------------|
| Mouse<br>Flg    | ENSMUSG00000102439 | TTC TCA GAA GGC<br>CAG GCA GTA | CCT CGC TGT GTT<br>CTT GCT CAT |
| Mouse<br>Flg2   | ENSMUSG00000049133 | ACA TTC TGG ATC<br>CGG TCA CG  | GGG CAC TTC TGG<br>TCT GAC TG  |
| Mouse<br>Spink7 | ENSMUSG00000060201 | Bio-Rad; 10025636              |                                |
| Mouse<br>Actb   | ENSMUSG00000029580 | TTC TTT GCA GCT<br>CCT TCG TT  | ATG GAG GGG AAT<br>ACA GCC C   |

**Supplemental Table 3. Genotyping primers**

|                                      |                                |
|--------------------------------------|--------------------------------|
| <b>Il20R2<sup>-/-</sup></b>          | <b>Stat3-flox</b>              |
| CAG TCC CAT AGA GTA CAC TGA G        | CAC CAA CAC ATG CTA TTT GTA GG |
| GGG AGA GAA AAT GCC CCA AAC C        | CCT GTC TCT GAC AGG CCA TC     |
|                                      | GCA GCA GAA TAC TCT ACA GCT C  |
| <b>Il19<sup>tdT</sup></b>            | <b>Cx3cr1-CreER</b>            |
| TGC TGC ATG ACC AAC AAC CT           | AAG ACT CAC GTG GAC CTG CT     |
| GAA TGA CAA TGT CCT GAC TCT GCA      | CGG TTA TTC AAC TTG CAC CA     |
| CAC GAC ATT CAA CAG ACC TTG CAT      | AGG ATG TTG ACT TCC GAG TTG    |
| <b>Il19-flox</b>                     | <b>Krt5-CreER</b>              |
| CAA ACT GCA AGG GAA CTC AGT AGT<br>G | GGA GGA AGT CAG AAC CAG GAC    |
| CAC AGA CAA GGT TTG TTC CAC AGC      | GCA AGA CCC TGG TCC TCA C      |
|                                      | ACC GGC CTT ATT CCA AGC        |

**Supplemental Table 4. Key resources**

| Reagent or Material                            | Supplier                          | Catalog No. |
|------------------------------------------------|-----------------------------------|-------------|
| <b>Cell culture Media / Supplements</b>        |                                   |             |
| Ascorbic Acid                                  | Sigma-Aldrich (Merck)             | A4544       |
| Bovine pituitary extract                       | Gibco (Thermo Fischer Scientific) | 3700015     |
| Calcium chloride                               | Sigma-Aldrich (Merck)             | 21115       |
| Cucurbitacin I                                 | Tocris (Bio-Techne)               | 1571/1      |
| Dimethyl sulfoxide<br>(DMSO), anhydrous >99,9% | Sigma-Aldrich (Merck)             | 276855      |
| Epidermal growth factor                        | Gibco (Thermo Fischer Scientific) | 3700015     |
| Fetal Bovine Serum (FBS)                       | Gibco (ThermoFischer Scientific)  | 10500064    |

|                                                   |                                   |               |
|---------------------------------------------------|-----------------------------------|---------------|
| Keratinocyte-SFM                                  | Gibco (Thermo Fischer Scientific) | 17005042      |
| Lipopolysaccharides from Escherichia coli O111:B4 | Sigma-Aldrich (Merck)             | L2630         |
| PD98059                                           | Cell Signaling Technology         | 9900          |
| Penicillin-Streptomycin                           | Gibco (Thermo Fischer Scientific) | 15140122      |
| Recombinant Human IL-19 Protein                   | R&D Systems (Bio-Techne)          | 1035-IL-025   |
| Recombinant Human IL-20 Protein                   | R&D Systems (Bio-Techne)          | 1102-IL-025   |
| Recombinant Human IL-24 Protein                   | R&D Systems (Bio-Techne)          | 1965-IL-025   |
| Recombinant Human KGF/FGF-7 Protein               | R&D Systems (Bio-Techne)          | 251-KG-010/CF |
| Recombinant Mouse IFN- $\gamma$ (carrier-free)    | BioLegend                         | 575306        |
| Recombinant Mouse IL-13 (carrier-free)            | BioLegend                         | 575904        |
| Recombinant Mouse IL-4 (carrier-free)             | BioLegend                         | 574304        |
| Recombinant Mouse M-CSF (carrier-free)            | BioLegend                         | 576406        |
| Rosell Park Memorial Institute (RPMI) 1640 Medium | Sigma-Aldrich (Merck)             | R8758         |
| Y-27632 dihydrochloride                           | Tocris (Bio-Techne)               | 1254          |
| <b>Reagents</b>                                   |                                   |               |
| Bovine Serum Albumin (BSA)                        | Sigma-Aldrich (Merck)             | A2153         |
| Buffer RLT                                        | Qiagen                            | 79216         |
| Calcipotriol (MC903)                              | Tocris (Bio-Techne)               | 2700          |



|                                                                            |                                           |             |
|----------------------------------------------------------------------------|-------------------------------------------|-------------|
| Collagenase from<br><i>Clostridium histolyticum</i><br>Type IV             | Sigma-Aldrich (Merck)                     | C5138       |
| Corn oil                                                                   | Sigma-Aldrich (Merck)                     | C8267       |
| Cultrex Basement<br>Membrane Extract (BME),<br>Type 2, Pathclear           | R&D Systems (Bio-Techne)                  | 3532-010-02 |
| DAB Substrate Kit                                                          | BD Biosciences                            | 550880      |
| Dimethyl sulfoxide<br>(DMSO), >99,5%<br>BioScience Grade                   | Carl Roth                                 | A994        |
| Dispase I                                                                  | Corning                                   | 354235      |
| Dispase II                                                                 | Sigma-Aldrich (Merck)                     | D4693       |
| DNase I recombinant                                                        | Roche                                     | 04536282001 |
| Dulbeccos Phosphate<br>Buffered Saline (DPBS)                              | Sigma-Aldrich (Merck)                     | D8537       |
| eBioscience™ Fixable<br>Viability Dye eFluor™<br>455UV                     | Invitrogen (Thermo Fischer<br>Scientific) | 65-0868-18  |
| eBioscience™ Streptavidin<br>eFluor™ 450 Conjugate                         | Invitrogen (Thermo Fischer<br>Scientific) | 48-4317-82  |
| Ethylenediaminetetraacetic<br>acid (EDTA)                                  | Sigma-Aldrich (Merck)                     | EDS         |
| Fluorescein isothiocyanate<br>(FITC)-dextran ; average<br>mol wt 3000-5000 | Sigma-Aldrich (Merck)                     | FD4         |
| Goat serum                                                                 | Sigma-Aldrich (Merck)                     | G9023       |
| HistoGel                                                                   | Epredia                                   | HG-4000-012 |
| Hydrogen peroxide                                                          | Carl Roth                                 | 9681        |
| Nuc Blue™ Live Ready<br>Probes™ Reagent (Hoechst<br>33342)                 | Invitrogen (Thermo Fischer<br>Scientific) | R37605      |
| Ovalbumin Grade 5                                                          | Sigma-Aldrich (Merck)                     | A5503       |

|                                                              |                                                   |               |
|--------------------------------------------------------------|---------------------------------------------------|---------------|
| Formaldehyde solution                                        | Sigma-Aldrich (Merck)                             | F8775         |
| PD98059                                                      | MedChemExpress                                    | HY-12028      |
| RIPA Lysis Buffer System                                     | Santa Cruz                                        | sc-24948      |
| Sodium azide                                                 | Sigma-Aldrich (Merck)                             | 71289         |
| Streptavidin PE/Cyanine5                                     | BioLegend                                         | 405205        |
| SuperSignal™ West Femto<br>Maximum Sensitivity<br>Substrate  | Thermo Scientific (Thermo<br>Fischer Scientific)  | 34095         |
| SuperSignal™ West Pico<br>PLUS Chemiluminescent<br>Substrate | Thermo Scientific (Thermo<br>Fischer Scientific)  | 34580         |
| Takyon™ Low ROX SYBR<br>2X MasterMix blue dTTP               | Eurogentec                                        | UF-LSMT-B0701 |
| Tamoxifen                                                    | MedChemExpress                                    | HY-13757A     |
| TRI Reagent®                                                 | Sigma-Aldrich (Merck)                             | T9424         |
| TrypLE Express Enzyme<br>(1X), phenol red                    | Gibco (Thermo Fischer<br>Scientific)              | 12605010      |
| Trypsin inhibitor from<br><i>Glycine max</i> (soybean)       | Sigma-Aldrich (Merck)                             | T9128         |
| Trypsin-EDTA                                                 | SAFC Biosciences (Merck)                          | 59418C        |
| TWEEN® 20                                                    | Sigma-Aldrich (Merck)                             | P1379         |
| <b>Critical Commercial Assays</b>                            |                                                   |               |
| Direct-zol RNA MiniPrep                                      | Zymo Research                                     | R2052         |
| DNase Max Kit<br>(discontinued)                              | Qiagen                                            | 15200         |
| High-Capacity cDNA<br>Reverse Transcription Kit              | Applied Biosystems<br>(Thermo Fischer Scientific) | 4368813       |
| QuantiNova SYBR Green<br>PCR Kit                             | Qiagen                                            | 208056        |
| RNeasy Plus Mini Kit                                         | Qiagen                                            | 74136         |
| Human IL-19 Quantikine<br>ELISA Kit                          | R&D Systems (Bio-Techne)                          | D1900         |

|                                              |                          |        |
|----------------------------------------------|--------------------------|--------|
| Human IL-20 Quantikine ELISA Kit             | R&D Systems (Bio-Techne) | DL200  |
| Human IL-24 DuoSet ELISA                     | R&D Systems (Bio-Techne) | DY1965 |
| ELISA MAX™ Deluxe Set Mouse IgE              | BioLegend                | 432404 |
| LEGEND MAX™ Mouse OVA Specific IgE ELISA Kit | BioLegend                | 439807 |

**Supplemental Table 5. Cell lines**

| Name     | Description                                                                                                                               | Source                                                                                | Reference       |
|----------|-------------------------------------------------------------------------------------------------------------------------------------------|---------------------------------------------------------------------------------------|-----------------|
| KYSE-180 | Esophageal squamous cell carcinoma cell line established from a well differentiated esophageal squamous cell carcinoma prior to treatment | Leibniz Institute DSMZ-German Collection of Microorganisms and Cell Cultures (ACC379) | (PMID: 1728357) |

**Supplemental Table 6. Antibodies**

| Antibody                                            | Clone      | Probe/Fluorophore            | Supplier                       | Cat No.     |
|-----------------------------------------------------|------------|------------------------------|--------------------------------|-------------|
| <b>Antibodies for Immunohistochemistry staining</b> |            |                              |                                |             |
| Filaggrin                                           | polyclonal |                              | Abcam                          | Ab81468     |
| Filaggrin family member 2                           | polyclonal |                              | Novus Biologicals (Bio-Techne) | NBP1-91901  |
| IL-20Ra                                             | 024        |                              | Sino Biological                | 10397-R024  |
| IL-20Rb                                             | polyclonal |                              | Abcam                          | ab124332    |
| Ki67                                                | SP6        |                              | Abcam                          | ab16667     |
| Peroxidase AffiniPure Goat                          | polyclonal | Horseradish Peroxidase (HRP) | Jackson ImmunoResearch         | 111-035-003 |

|                                                                       |            |                 |                                           |             |
|-----------------------------------------------------------------------|------------|-----------------|-------------------------------------------|-------------|
| anti-rabbit IgG<br>(H+L)                                              |            |                 |                                           |             |
| <b>Antibodies used for flow cytometry surface staining (Fortessa)</b> |            |                 |                                           |             |
| CD11c                                                                 | N418       | Biotin          | BioLegend                                 | 117304      |
| CD19                                                                  | 6D56       | Biotin          | BioLegend                                 | 115504      |
| CD3e                                                                  | 145-2C11   | Biotin          | BioLegend                                 | 100304      |
| NK1.1                                                                 | PK136      | Biotin          | BioLegend                                 | 108704      |
| TER-119/Erythroid cells                                               | TER-119    | Biotin          | BioLegend                                 | 116204      |
| CD117 (c-kit)                                                         | 2B8        | APC/Fire 750    | BioLegend                                 | 105838      |
| CD11b                                                                 | M1/70      | Pacific Blue    | BioLegend                                 | 101206      |
| CD16/32                                                               | 93         |                 | BioLegend                                 | 101302      |
| CD45                                                                  | 30-F11     | Superbright 645 | Invitrogen<br>(Thermo Fischer Scientific) | 64-0451-82  |
| CD49b (Integrin alpha2)                                               | DX5        | APC             | Invitrogen<br>(Thermo Fischer Scientific) | 17-5971-82  |
| CD64 (FcγR1)                                                          | X54-5/7.1  | PE/Cy7          | BioLegend                                 | 139314      |
| IgE                                                                   | 23G3       | FITC            | Invitrogen<br>(Thermo Fischer Scientific) | 11-5992-81  |
| Siglec-F                                                              | E50-2440   | BV711           | BD Biosciences                            | 740764      |
| <b>Antibodies used for Immunofluorescence staining</b>                |            |                 |                                           |             |
| Keratin 5                                                             | Poly9059   |                 | BioLegend                                 | 905903      |
| Stat3                                                                 | D3Z2G      |                 | Cell Signaling Technology                 | 12640S      |
| AffiniPure Goat Anti-Chicken IgY (IgG) (H+L)                          | polyclonal | Alexa Fluor 488 | Jackson ImmunoResearch                    | 103-545-155 |

|                                             |                   |                                              |                  |
|---------------------------------------------|-------------------|----------------------------------------------|------------------|
| Goat Anti-<br>Rabbit IgG<br>(H+L)           | Alexa Fluor® 647  | Invitrogen<br>(Thermo Fischer<br>Scientific) | A21244           |
| <b>Antibodies used for Cell Sorting</b>     |                   |                                              |                  |
| CD45.2                                      | 104               | BV650                                        | BioLegend 109836 |
| <b>Antibodies used for Cell Hashing</b>     |                   |                                              |                  |
| TotalSeq-B0301                              | M1/42; 30-<br>F11 | BioLegend                                    | 155831           |
| TotalSeq-B0302                              | M1/42; 30-<br>F11 | BioLegend                                    | 155833           |
| TotalSeq-B0303                              | M1/42; 30-<br>F11 | BioLegend                                    | 155835           |
| TotalSeq-B0304                              | M1/42; 30-<br>F11 | BioLegend                                    | 155837           |
| TotalSeq-B0305                              | M1/42; 30-<br>F11 | BioLegend                                    | 155839           |
| TotalSeq-B0306                              | M1/42; 30-<br>F11 | BioLegend                                    | 155841           |
| TotalSeq-B0307                              | M1/42; 30-<br>F11 | BioLegend                                    | 155843           |
| TotalSeq-B0308                              | M1/42; 30-<br>F11 | BioLegend                                    | 155845           |
| TotalSeq-B0309                              | M1/42; 30-<br>F11 | BioLegend                                    | 155847           |
| TotalSeq-B0310                              | M1/42; 30-<br>F11 | BioLegend                                    | 155849           |
| <b>Antibodies used for Western Blotting</b> |                   |                                              |                  |
| Phospho-Stat3<br>(Tyr705)                   | D3A7              | Cell Signaling<br>Technology                 | 9145             |
| Stat3                                       | 124H6             | Cell Signaling<br>Technology                 | 9139             |
| Phospho-p44/42<br>MAPK                      | D13.14.4E         | Cell Signaling<br>Technology                 | 4370             |

|                        |            |                |             |
|------------------------|------------|----------------|-------------|
| (ERK1/2)               |            |                |             |
| (Thr202/Tyr204)        |            |                |             |
| p44/42 MAPK            | 137F5      | Cell Signaling | 4695        |
| (ERK1/2)               |            | Technology     |             |
| Phospho-NF- $\kappa$ B | 93H1       | Cell Signaling | 3033        |
| p65 (Ser536)           |            | Technology     |             |
| NF- $\kappa$ B p65     | D14E12     | Cell Signaling | 8242        |
|                        |            | Technology     |             |
| Actin Ab-5             | C4         | BD Biosciences | 612656      |
| Peroxidase             | polyclonal | Jackson        | 111-035-144 |
| AffiniPure Goat        |            | ImmunoResearch |             |
| Anti-Rabbit IgG        |            |                |             |
| (H+L)                  |            |                |             |
| Peroxidase             | polyclonal | Jackson        | 111-035-146 |
| AffiniPure Goat        |            | ImmunoResearch |             |
| Anti-Mouse IgG         |            |                |             |
| (H+L)                  |            |                |             |

SUPPLEMENTAL FIGURES

Supplemental Figure 1

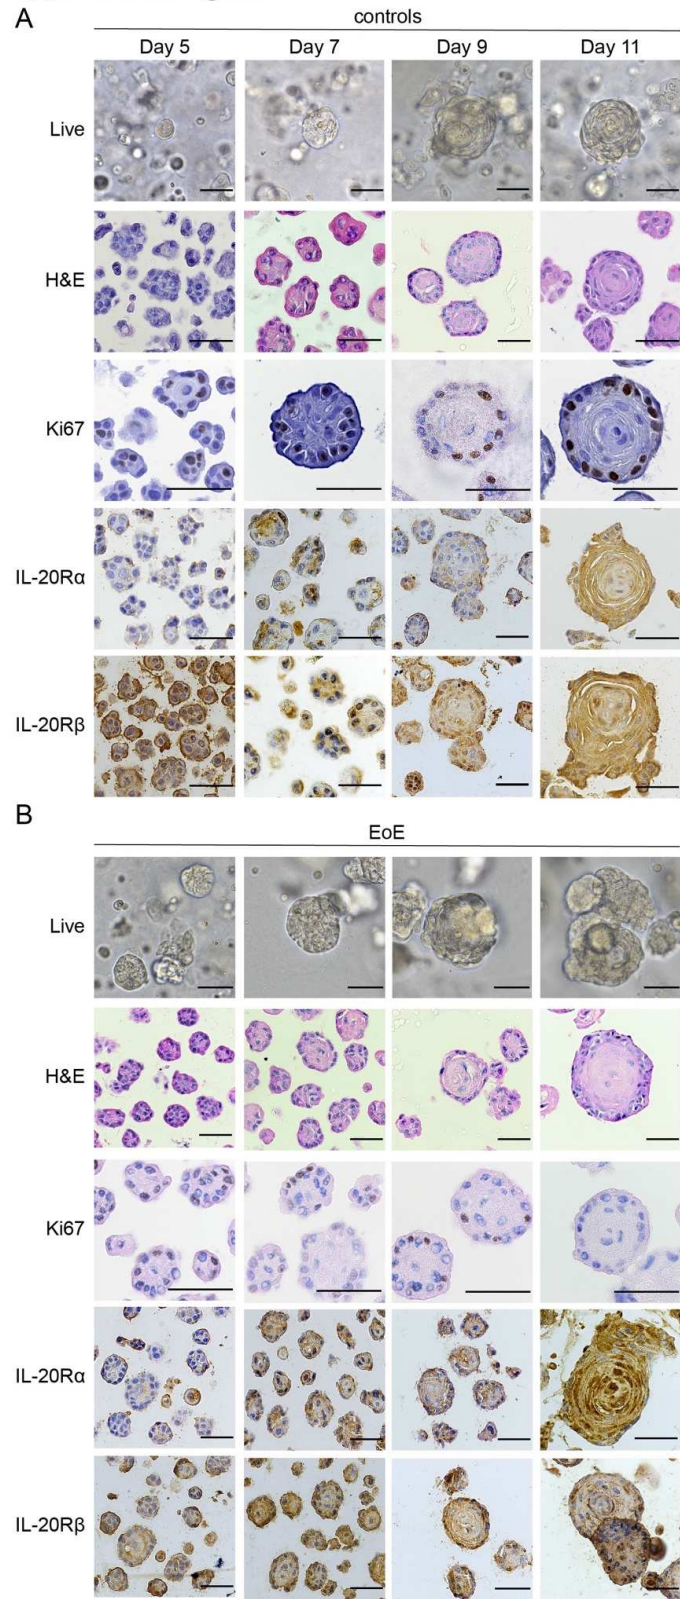

**Supplemental Figure 1. Characterisation of patient-derived esophageal organoids**

In culture brightfield images, H&E, Ki67, IL-20R $\alpha$  and IL-20R $\beta$  staining of esophageal organoids from (A) control individuals and (B) EoE patients at indicated timepoints of culture. Scale bars, 50  $\mu$ M



Supplemental Figure 2

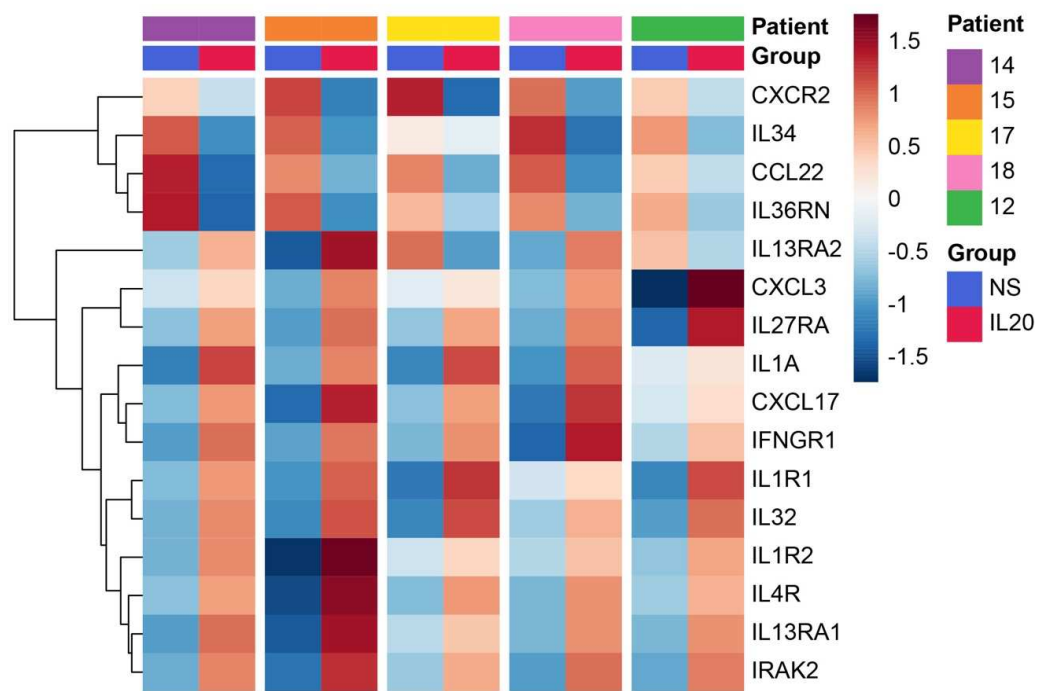

Supplemental Figure 2. Heatmap showing the centered and scaled expression levels of selected cytokines and cytokine receptors in the RNA-seq dataset

Supplemental Figure 3

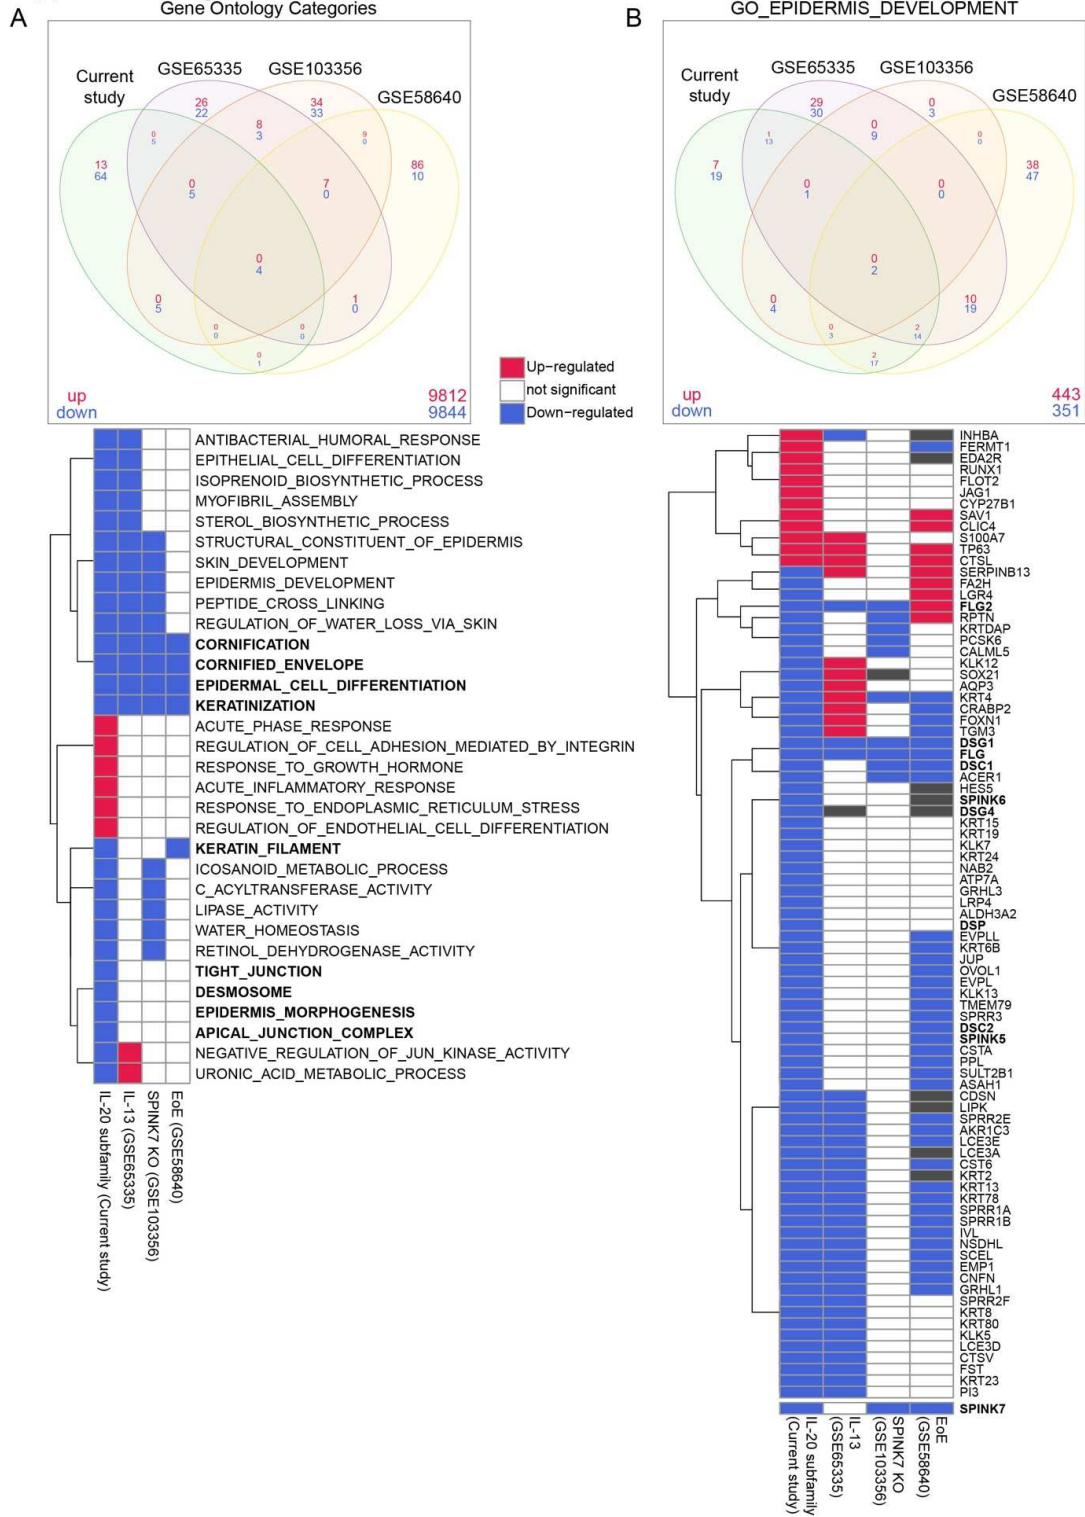

**Supplemental Figure 3. Comparison of published RNA-seq transcriptomes to the IL-20 subfamily stimulated esophageal organoid transcriptome**

(A) Comparison of GSEA results from our dataset to those from reanalysed published datasets: keratinocytes stimulated with IL-13 (GSE65335), SPINK7-deficient keratinocytes (GSE103356), and the EoE transcriptome (GSE58640). In the heatmap, a selected subset of categories significant in our dataset are shown.

(B) Comparison of differently expressed genes annotated to the Gene Ontology category “Epidermis development” in the different datasets. Only genes significant in our dataset are shown. *SPINK7* was added at the bottom of the heatmap.

Supplemental Figure 4

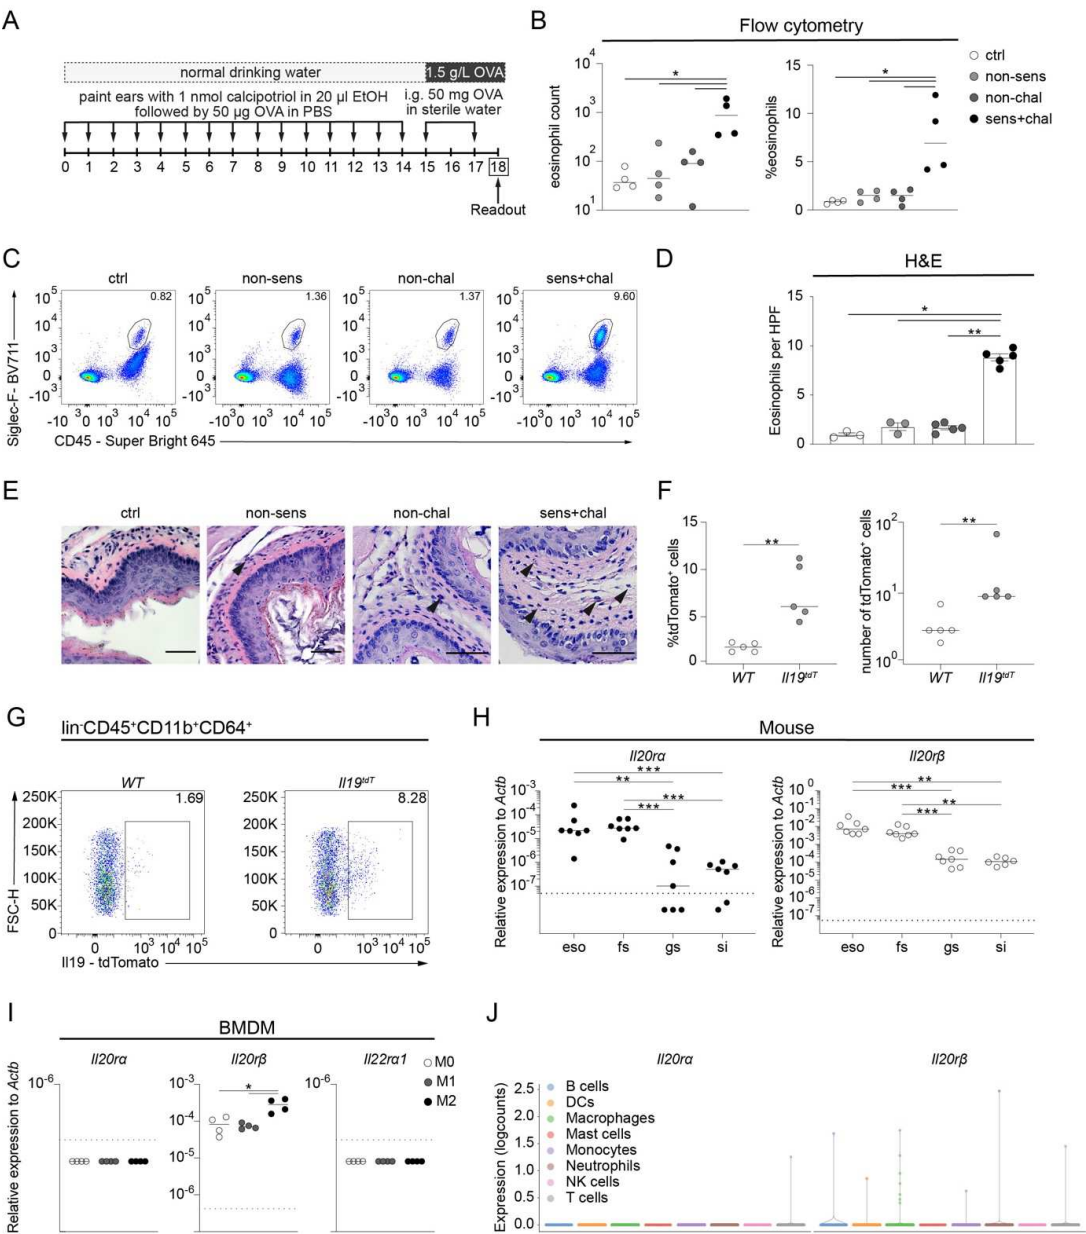

**Supplemental Figure 4. OVA-induced EoE mouse model, *Il20* subfamily expression by murine macrophages and murine *Il20r* expression**

- (A) Schematic illustration of experimental EoE model.
- (B) Quantification of eosinophil infiltration from flow cytometry data in absolute cell counts and in percentages.
- (C) Dot blots indicate the esophageal eosinophil infiltration by flow cytometry. Numbers indicate the percentage of eosinophils.
- (D) Counted eosinophils (per HPF) from (E).
- (E) H&E staining of esophageal sections obtained from *WT* mice; ctrl: non-sensitised+non-challenged, non-sens: non-sensitised+challenged, non-chal: sensitised+non-challenged, sens+chal: sensitised+challenged. Arrows indicate eosinophils. Scale bars, 50  $\mu$ m.
- (F) Quantification of Il19-producing macrophage infiltration in percentages and absolute cell counts from flow cytometry data in (G).
- (G) Dot blots indicate the esophageal infiltration of Il19-producing macrophages (CD45<sup>+</sup>CD11b<sup>+</sup>CD64<sup>+</sup>tdTomato<sup>+</sup>) by flow cytometry. Numbers indicate the percentage of Il19-producing macrophages.
- (H) *Il20ra* and *Il20r $\beta$*  mRNA expression in murine esophagus (eso), forestomach (fs), glandular stomach (gs) and small intestine (si) by qPCR.
- (I) *Il20ra*, *Il20r $\beta$*  and *Il22ra1* mRNA expression in murine M0, M1 and M2 polarised BMDMs by qPCR.
- (J) Normalised expression levels of *Il20ra* and *Il20r $\beta$*  in annotated cell types from the scRNA-seq dataset.

Data are presented as individual values with medians, with each dot representing one biological replicate. \*  $p < 0.05$ , \*\*  $p < 0.01$ , \*\*\*  $p < 0.001$ , by Mann-Whitney U test

Supplemental Figure 5

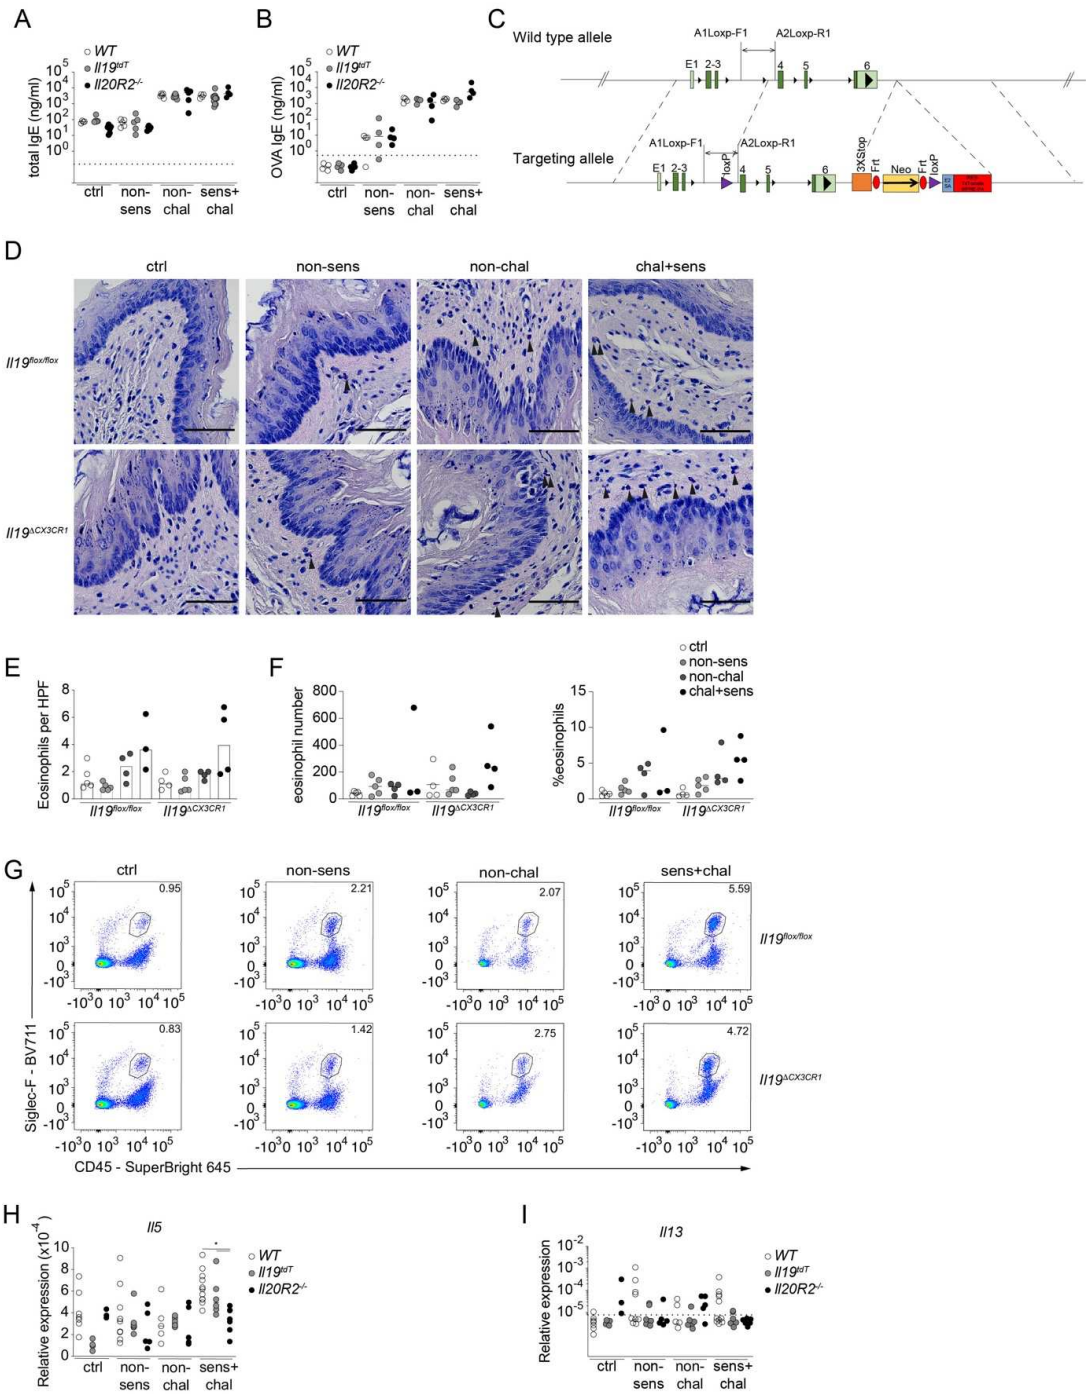

**Supplemental Figure 5. Total and OVA-specific IgE levels and Th2-cytokine expression in *WT*, *Il19<sup>tdT</sup>* and *Il20R2<sup>-/-</sup>* mice and OVA-induced EoE model in *Il19<sup>ΔCX3CR1</sup>* mice**

(A) Total and (B) OVA-specific IgE levels in *WT*, *Il19<sup>tdT</sup>* and *Il20R2<sup>-/-</sup>* mice. ctrl: non-sensitised+non-challenged, non-sens: non-sensitised+challenged, non-chal: sensitised+non-challenged, sens+chal: sensitised+challenged

(C) Construct design of *Il19<sup>lox/lox</sup>* mice.

(D) H&E staining of esophageal sections obtained from *Il19<sup>lox/lox</sup>* and *Il19<sup>ΔCX3CR1</sup>* mice; ctrl: non-sensitised+non-challenged, non-sens: non-sensitised+challenged, non-chal: sensitised+non-challenged, sens+chal: sensitised+challenged. Arrows indicate eosinophils.

Scale bars, 50  $\mu$ m.

(E) Counted eosinophils (per HPF) from (D).

(F) Quantification of eosinophil infiltration from flow cytometry data in absolute cell counts and in percentages.

(G) Dot blots indicate esophageal eosinophil infiltration by flow cytometry. Numbers indicate the percentage of eosinophils.

(H) *Il5* and (I) *Il13* mRNA expression relative to *Actb* in *WT*, *Il19<sup>tdT</sup>* and *Il20R2<sup>-/-</sup>* mice by qPCR. ctrl: non-sensitised+non-challenged, non-sens: non-sensitised+challenged, non-chal: sensitised+non-challenged, sens+chal: sensitised+challenged

Data are presented as individual values with medians, with each dot representing one biological replicate. \*  $p < 0.05$ , by Mann-Whitney U test



## Supplemental Figure 6

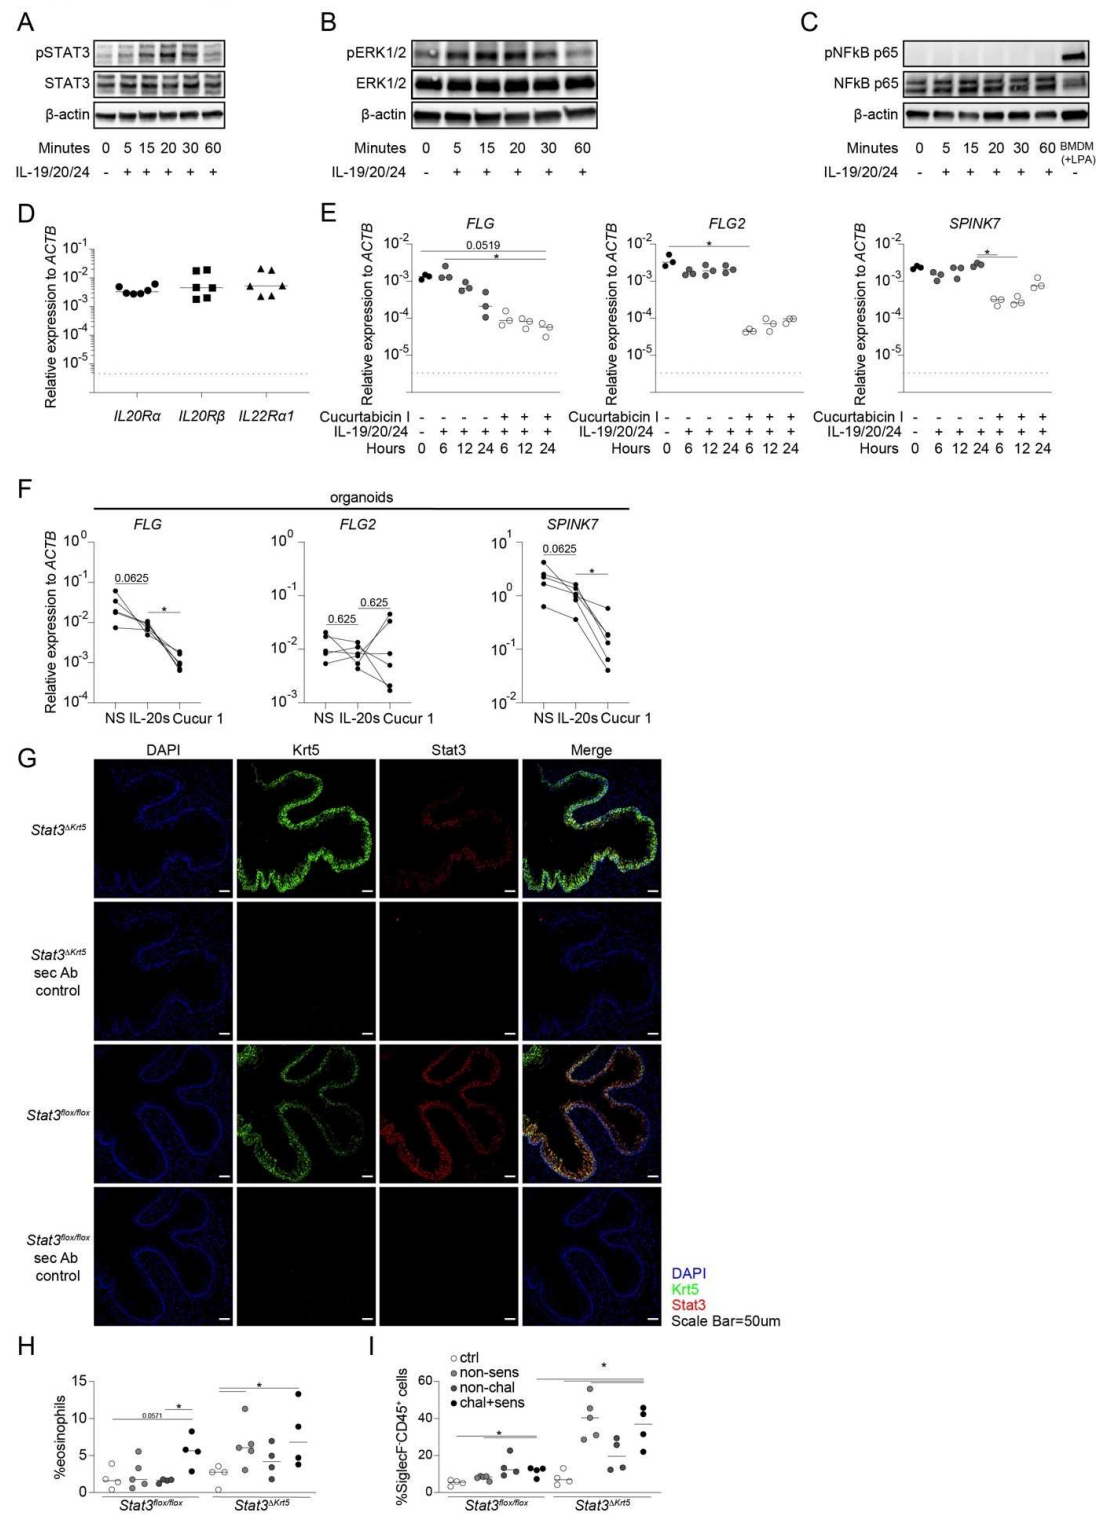



**Supplemental Figure 6. STAT3, ERK1/2 and NFκB phosphorylation and expression of *FLG*, *FLG2* and *SPINK7* upon stimulation with IL-20 subfamily in KYSE-180 cell line and esophageal organoids, and immunofluorescence of tamoxifen induced Stat3 deletion in *Stat3<sup>ΔKrt5cre</sup>* mice.**

(A-C) Western blot for activation of (A) STAT3, (B) ERK1/2 and (C) NFκB in keratinocyte cell line KYSE-180 upon stimulation with IL-20 subfamily cytokines. Protein lysate from BMDMs stimulated with lysophosphatidic acid (LPA) was used as a positive control for pNFκB p65 in (C).

(D) *IL20Rα*, *IL20Rβ* and *IL22Rα1* mRNA expression in KYSE-180 cell line by qPCR

(E) *FLG*, *FLG2*, *SPINK7* mRNA expression in KYSE-180 cell line after stimulation with IL-20 subfamily cytokines over indicated timespan by qPCR.

(F) *FLG*, *FLG2* and *SPINK7* mRNA expression in patient-derived esophageal organoids stimulated with IL-20 subfamily cytokines (IL-20s) and IL-20s stimulated organoids pretreated with Cucurbitacin 1 (Cucur 1) by qPCR.

(G) Immunofluorescence staining for Krt5 and Stat3 in tamoxifen-treated *Stat3<sup>flox/flox</sup>* and *Stat3<sup>ΔKrt5cre</sup>* mice.

(H+I) Percentages of (H) eosinophils and (I) Siglec-F<sup>+</sup>CD45<sup>+</sup> cells in flow cytometry analysis of *Stat3<sup>flox/flox</sup>* and *Stat3<sup>ΔKrt5</sup>* mice. ctrl: non-sensitised+non-challenged, non-sens: non-sensitised+challenged, non-chal: sensitised+non-challenged, sens+chal: sensitised+challenged

Data are presented as individual values with medians, with each dot representing one biological replicate. \* p<0.05, by Mann-Whitney U, Wilcoxon or Kruskal-Wallis test

Supplemental Figure 7

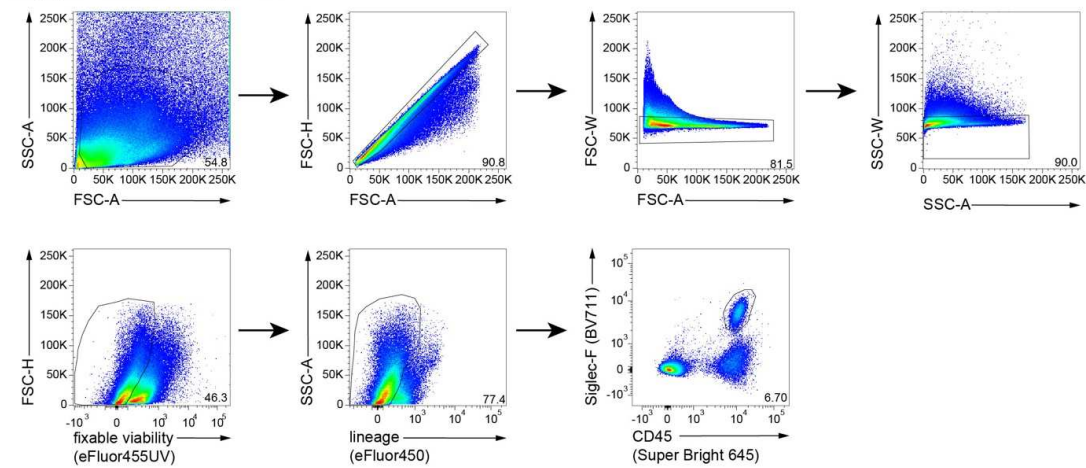

Supplemental Figure 7. Flow cytometry gating strategy for murine eosinophils

Supplemental Figure 8

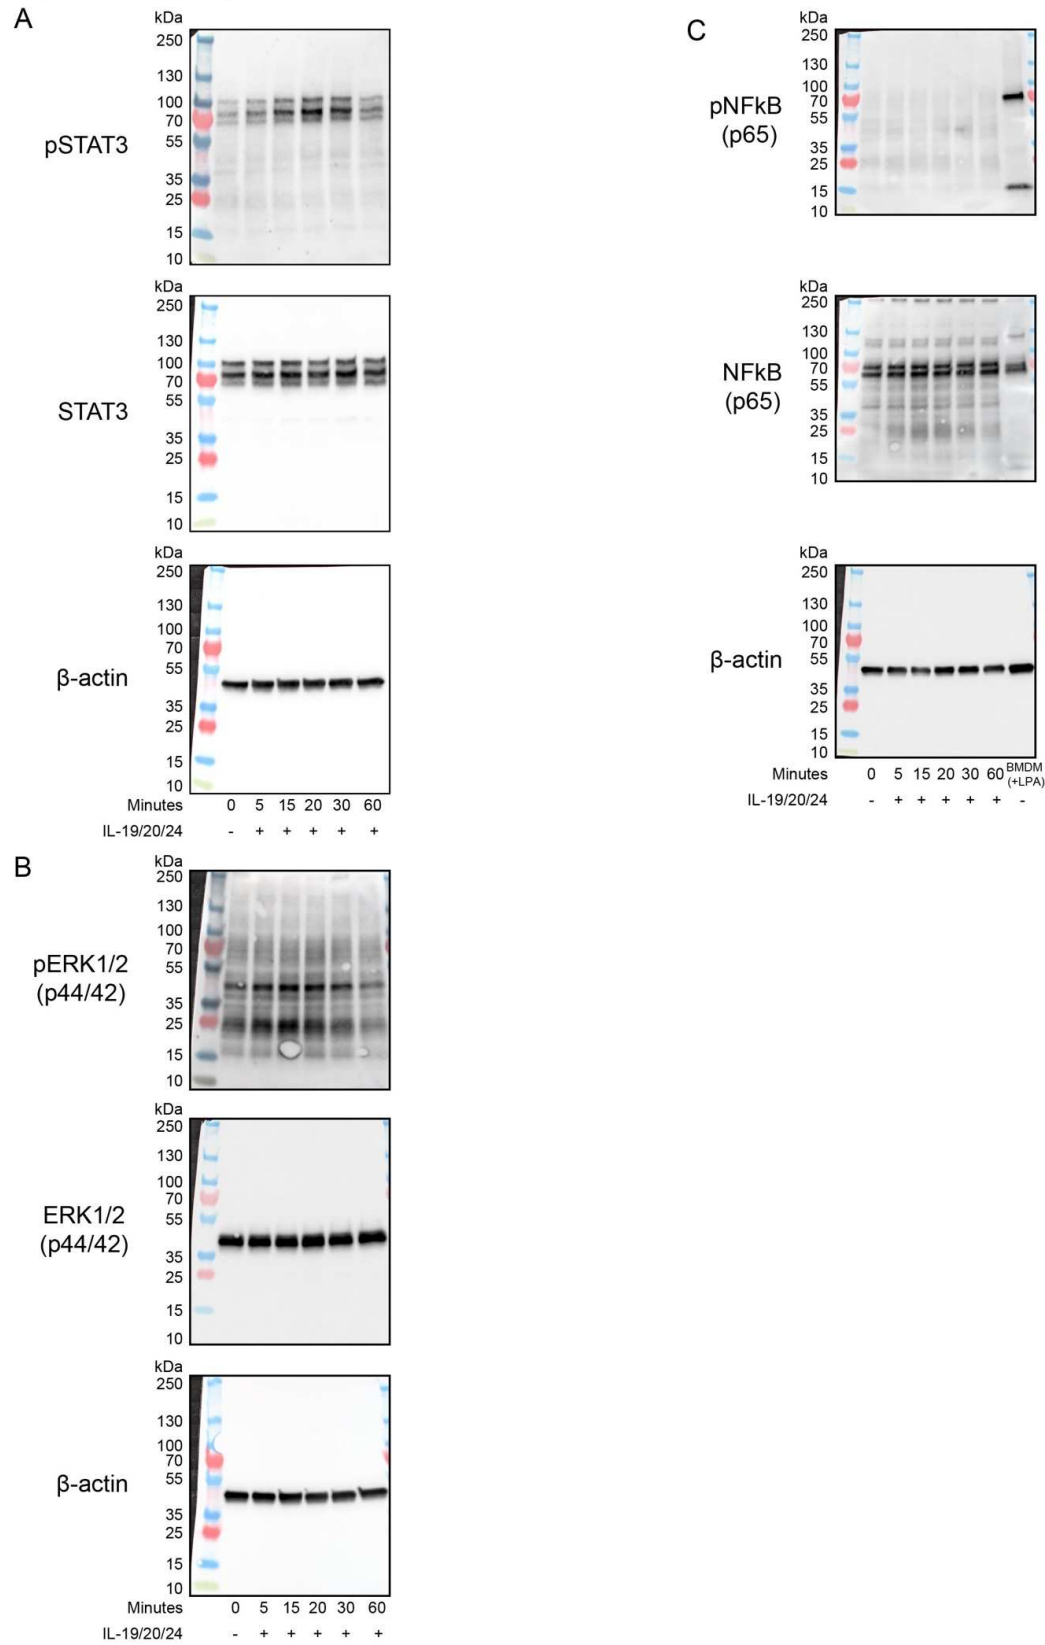

**Supplemental Figure 8. Activation of STAT3, ERK1/2 and NFκB upon stimulation with IL-20 subfamily cytokines**

Whole membrane images of western blots represented in supplemental figure 6A-C.

## SUPPLEMENTAL REFERENCES

- 1 Steinert A, Linas I, Kaya B, et al. The Stimulation of Macrophages with TLR Ligands Supports Increased IL-19 Expression in Inflammatory Bowel Disease Patients and in Colitis Models. *J Immunol* 2017;199:2570-84.
- 2 Wahl C, Muller W, Leithauser F, et al. IL-20 receptor 2 signaling down-regulates antigen-specific T cell responses. *J Immunol* 2009;182:802-10.
- 3 Alonzi T, Maritano D, Gorgoni B, et al. Essential role of STAT3 in the control of the acute-phase response as revealed by inducible gene inactivation [correction of activation] in the liver. *Mol Cell Biol* 2001;21:1621-32.
- 4 Kasagi Y, Chandramouleeswaran PM, Whelan KA, et al. The Esophageal Organoid System Reveals Functional Interplay Between Notch and Cytokines in Reactive Epithelial Changes. *Cell Mol Gastroenterol Hepatol* 2018;5:333-52.
- 5 Noti M, Wojno ED, Kim BS, et al. Thymic stromal lymphopoietin-elicited basophil responses promote eosinophilic esophagitis. *Nat Med* 2013;19:1005-13.
- 6 Schindelin J, Arganda-Carreras I, Frise E, et al. Fiji: an open-source platform for biological-image analysis. *Nat Methods* 2012;9:676-82.
- 7 Bankhead P, Loughrey MB, Fernandez JA, et al. QuPath: Open source software for digital pathology image analysis. *Sci Rep* 2017;7:16878.
- 8 Dobin A, Davis CA, Schlesinger F, et al. STAR: ultrafast universal RNA-seq aligner. *Bioinformatics* 2013;29:15-21.
- 9 Liao Y, Smyth GK, Shi W. featureCounts: an efficient general purpose program for assigning sequence reads to genomic features. *Bioinformatics* 2014;30:923-30.
- 10 Amezquita RA, Lun ATL, Becht E, et al. Orchestrating single-cell analysis with Bioconductor. *Nat Methods* 2020;17:137-45.
- 11 Huber W, Carey VJ, Gentleman R, et al. Orchestrating high-throughput genomic analysis with Bioconductor. *Nat Methods* 2015;12:115-21.
- 12 Robinson MD, McCarthy DJ, Smyth GK. edgeR: a Bioconductor package for differential expression analysis of digital gene expression data. *Bioinformatics* 2010;26:139-40.
- 13 Robinson MD, Oshlack A. A scaling normalization method for differential expression analysis of RNA-seq data. *Genome Biol* 2010;11:R25.
- 14 Lun AT, Chen Y, Smyth GK. It's DE-licious: A Recipe for Differential Expression Analyses of RNA-seq Experiments Using Quasi-Likelihood Methods in edgeR. *Methods Mol Biol* 2016;1418:391-416.
- 15 Wu D, Smyth GK. Camera: a competitive gene set test accounting for inter-gene correlation. *Nucleic Acids Res* 2012;40:e133.
- 16 Liberzon A, Birger C, Thorvaldsdottir H, et al. The Molecular Signatures Database (MSigDB) hallmark gene set collection. *Cell Syst* 2015;1:417-25.
- [dataset] [17] Kaymak T, Niess JH, Roux J. Studying the transcriptomic effects of the IL-20 cytokine subfamily on the esophageal epithelium. Gene Expression Omnibus, November 22, 2021. <https://www.ncbi.nlm.nih.gov/geo/query/acc.cgi?acc=GSE181261>
- [dataset] [18] Sherrill JD, Rothenberg ME. Analysis and expansion of the eosinophilic esophagitis transcriptome by RNA sequencing. Gene Expression Omnibus, June 16, 2019. <https://www.ncbi.nlm.nih.gov/geo/query/acc.cgi?acc=GSE58640>
- [dataset] [19] Rothenberg ME, Sherrill JD. Genome-wide expression profiling of an in vitro model for studying esophageal epithelial differentiation. Gene Expression Omnibus, October 07, 2019. <https://www.ncbi.nlm.nih.gov/geo/query/acc.cgi?acc=GSE65335>
- [dataset] [20] Rothenberg ME, Azouz NP. SPINK7 transcriptome. Gene Expression Omnibus, July 25, 2021. <https://www.ncbi.nlm.nih.gov/geo/query/acc.cgi?acc=GSE103356>

- 21 Ahrne E, Glatter T, Vigano C, et al. Evaluation and Improvement of Quantification Accuracy in Isobaric Mass Tag-Based Protein Quantification Experiments. *J Proteome Res* 2016;15:2537-47.
- 22 Wang Y, Yang F, Gritsenko MA, et al. Reversed-phase chromatography with multiple fraction concatenation strategy for proteome profiling of human MCF10A cells. *Proteomics* 2011;11:2019-26.
- 23 Ritchie ME, Phipson B, Wu D, et al. limma powers differential expression analyses for RNA-sequencing and microarray studies. *Nucleic Acids Res* 2015;43:e47.
- 24 Perez-Riverol Y, Bai J, Bandla C, et al. The PRIDE database resources in 2022: a hub for mass spectrometry-based proteomics evidences. *Nucleic Acids Res* 2022;50:D543-D52. [dataset] [25] Kaymak T, Niess JH, Schmidt A. Aberrant IL-20 Subfamily Signaling Disturbs Epithelial Barrier Function in Eosinophilic Esophagitis. Proteomics Identifications Database, February 09, 2022. <https://doi.org/10.6019/PXD031509>
- 26 Yates AD, Achuthan P, Akanni W, et al. Ensembl 2020. *Nucleic Acids Res* 2020;48:D682-D88.
- 27 Griffiths JA, Richard AC, Bach K, et al. Detection and removal of barcode swapping in single-cell RNA-seq data. *Nat Commun* 2018;9:2667.
- 28 Lun ATL, Riesenfeld S, Andrews T, et al. EmptyDrops: distinguishing cells from empty droplets in droplet-based single-cell RNA sequencing data. *Genome Biol* 2019;20:63.
- 29 Lun AT, McCarthy DJ, Marioni JC. A step-by-step workflow for low-level analysis of single-cell RNA-seq data with Bioconductor. *F1000Res* 2016;5:2122.
- 30 McCarthy DJ, Campbell KR, Lun AT, et al. Scater: pre-processing, quality control, normalization and visualization of single-cell RNA-seq data in R. *Bioinformatics* 2017;33:1179-86.
- 31 Ilicic T, Kim JK, Kolodziejczyk AA, et al. Classification of low quality cells from single-cell RNA-seq data. *Genome Biol* 2016;17:29.
- 32 Vallejos CA, Risso D, Scialdone A, et al. Normalizing single-cell RNA sequencing data: challenges and opportunities. *Nat Methods* 2017;14:565-71. [dataset] [33] Kaymak T, Niess JH, Roux J. scRNA-seq analysis of the effect IL20RB knock-out in esophageal immune cells of an eosinophilic esophagitis (EoE) mouse model. Gene Expression Omnibus, December 09, 2021. <https://www.ncbi.nlm.nih.gov/geo/query/acc.cgi?acc=GSE190482>
